# Supplementary material for: Essential genes shape cancer genomes through linear limitation of homozygous deletions
Source: PubMed Central journal article supplement (PMC6642121; doi:10.1038/s42003-019-0517-0), 2019-07-19
Supplement: 42003_2019_517_MOESM1_ESM.pdf [file 42003_2019_517_MOESM1_ESM.pdf]

# Supplementary Figure 1

**Additional simulation plots.** These additional simulation plots were carried out in the same way as in Fig. 1, but with different parameter settings: **(a)** 1% chance of regional deletions, 2% chance for point mutations and 1% chance of reduplication, **(b)** 5% chance of regional deletions, 5% chance for point mutations and 20% chance of reduplication and **(c)** 50% chance of regional deletions, 1% chance for point mutations and 1% chance of reduplication. These additional simulation illustrate that, although changing the parameter settings may change the frequency of hemizygous and homozygous deletion frequencies, the linear deletion limitation pattern at the EGs closest to the deletion target persists, independently of parameter settings.

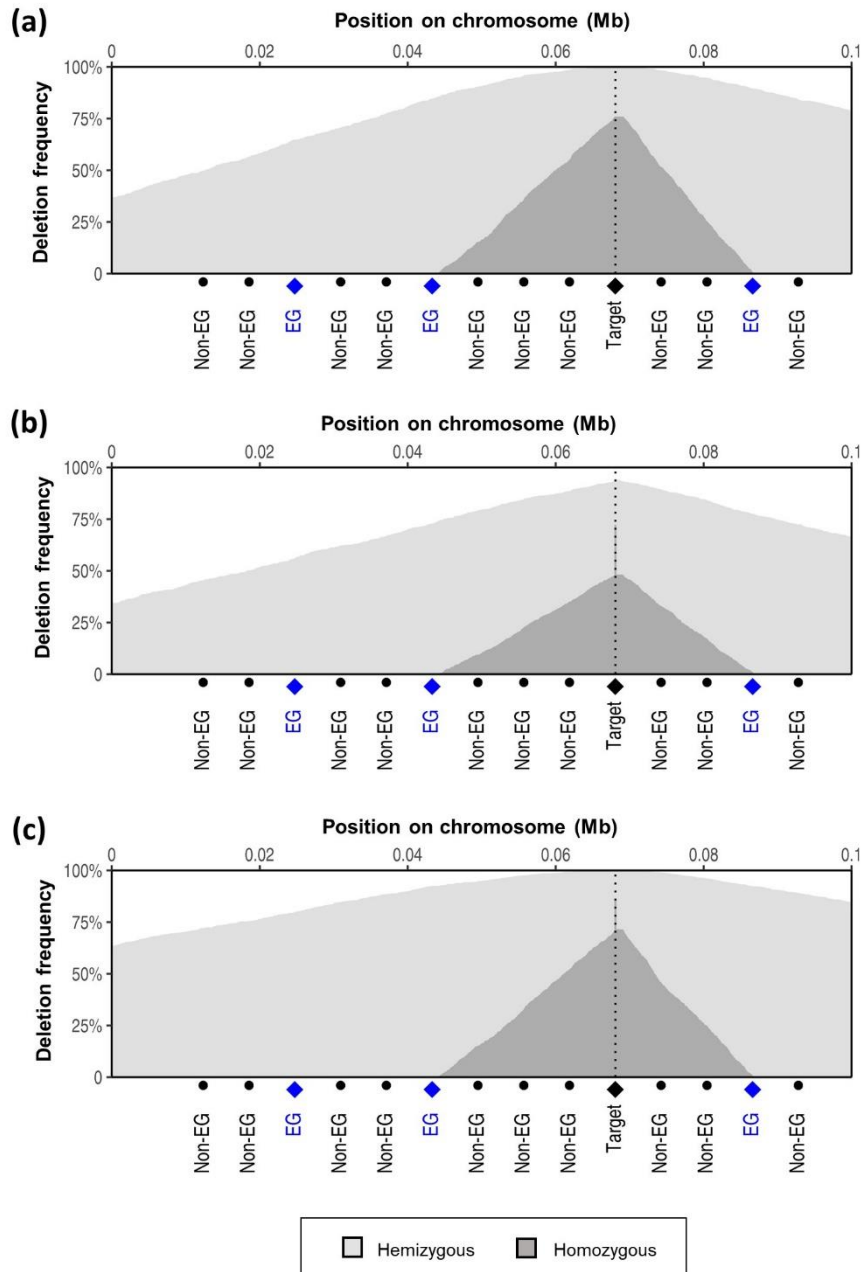

## Supplementary Figure 2

Distributions of observed copy numbers *vs* size for deletions in TCGA (a), CCLE (b), and Tumorscape (c). The dashed lines indicate the positions of the thresholds used to call homozygous deletions. These thresholds were positioned left of where the distributions of very large lesions thin out. As discussed in detail in Methods, the motivation for this is that very large lesions (in the order of 50-100 million base pairs; corresponding to whole chromosomes or big parts of chromosomes) are most often hemizygous since the probability that they include at least one essential gene is close to 1.

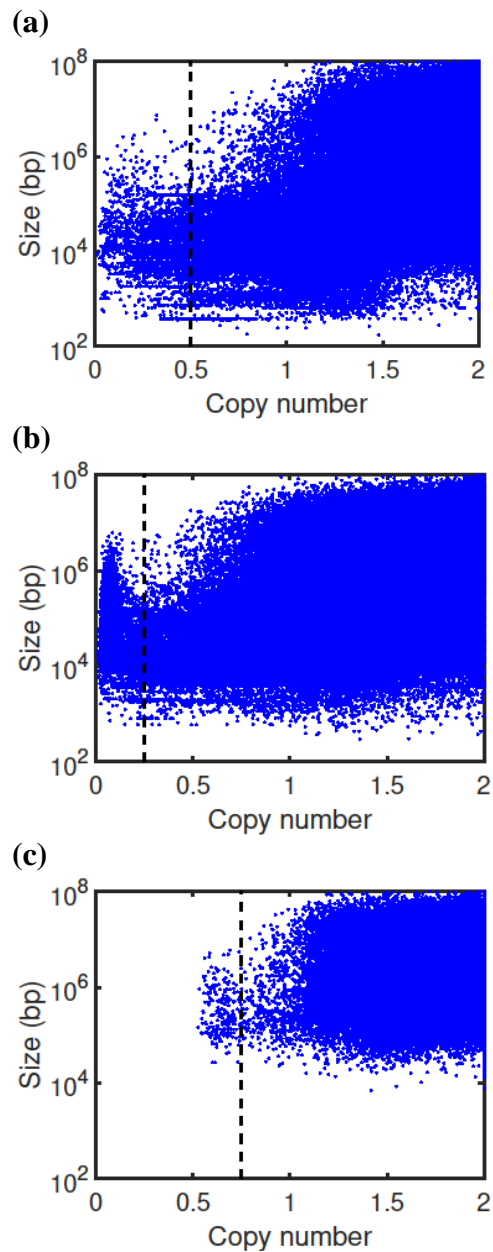

# Supplementary Figure 3

Estimated tumor cell fractions for TCGA (a), CCLE (b), and Tumorscape (c). The median estimated fractions were 89%, 99%, and 58%, respectively.

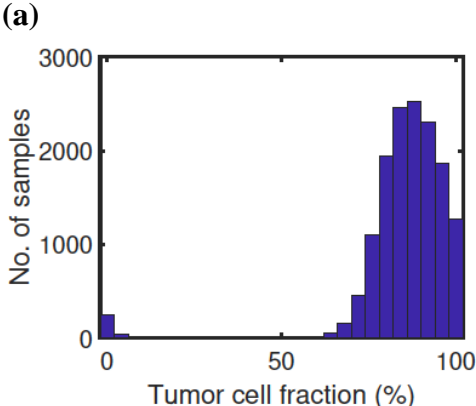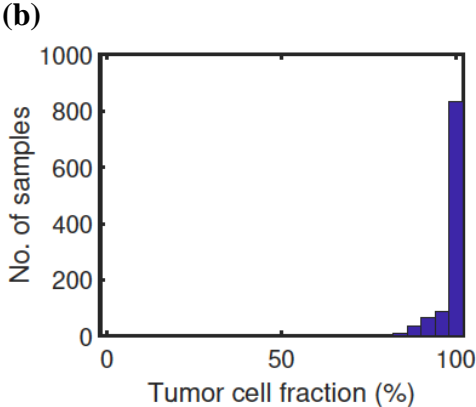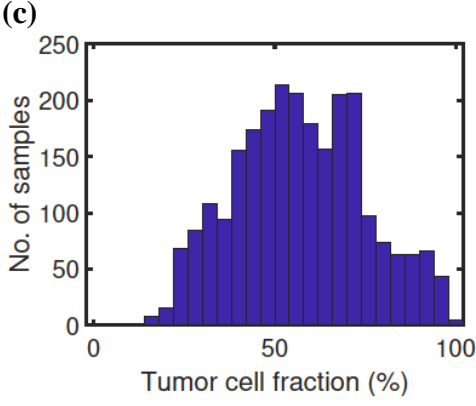

## Supplementary Figure 4

**Deletion frequencies of target genes.** Heatmap showing the deletion frequencies of the likely target genes in the regions harboring the identified deletion-limiting genes. Data from TCGA<sup>21</sup> and Tumorscape<sup>23</sup>. BLCA: Bladder Carcinoma, BRCA: Breast Carcinoma, COAD: Colon Adenocarcinoma, DLBC: Diffuse Large B-cell Lymphoma, GBM: glioblastoma, HNSC: Head and Neck Squamous Cell Carcinoma, KICH: Kidney Chromophobe, KIRC: Kidney Renal Clear Cell Carcinoma, KIRP: Kidney Renal Papillary Cell Carcinoma, LAML: Acute Myeloid Leukemia, LGG: Brain Lower Grade Glioma, LIHC: Liver Hepatocellular Carcinoma, LUAD: Lung Adenocarcinoma, LUSC: Lung Squamous Cell Carcinoma, OV: Ovarian Serous Cystadenocarcinoma, PAAD: Pancreatic Adenocarcinoma, PRAD: Prostate Adenocarcinoma, READ: Rectum Adenocarcinoma, SARC: Sarcoma, SKCM: Skin Cutaneous Melanoma, STAD: Stomach Adenocarcinoma, THCA: Thyroid Carcinoma, UCEC: Uterine Corpus Endometrial Carcinoma, ALL: Acute Lymphoblastic Leukemia, GI: Gastrointestinal (COAD, esophageal, gastric, gastrointestinal stromal tumor), KI: Kidney (KICH, KIRC, KIRP, oncocytoma), LI: Liver (LIHC), LU: Lung (LUAD, LUSC, bronchioloalveolar carcinoma, large cell carcinoma, mesothelioma), MDS: Myelodysplastic syndrome, MPD: Myeloproliferative Disorder, CNS: Central Nervous System (glioma, medulloblastoma, meningioma, neuroblastoma, rhabdoid, schwannoma), OV: Ovarian, PR: Prostate cancer.

### (a) Hemizygous deletions

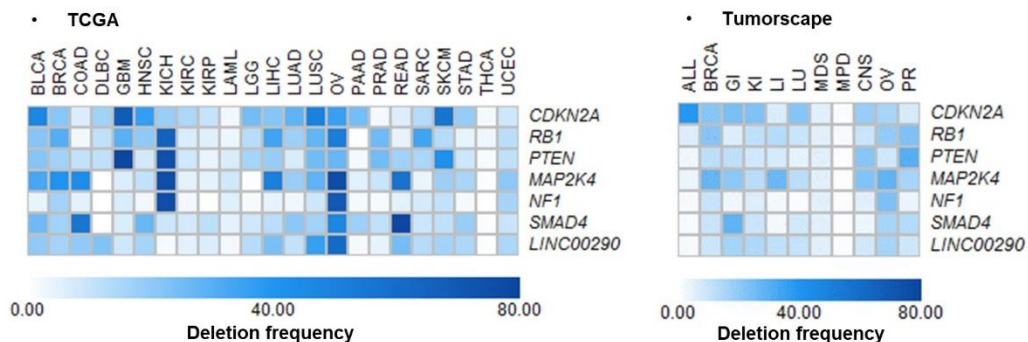

### (b) Homozygous deletions

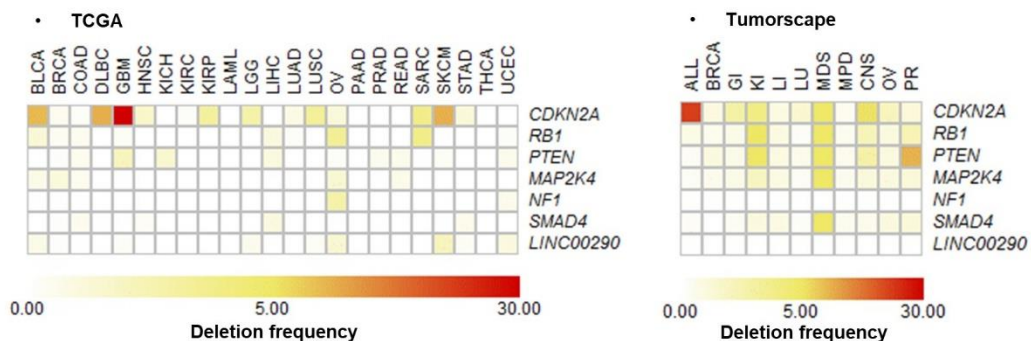

## Supplementary Figure 5

Patterns of hemizygous and homozygous deletion across copy number profiles of 1,043 cancer cell lines from the Cancer Cell Line Encyclopedia (CCLE) in the seven genomic regions showing deletion-limitation in TCGA: *CDKN2A* (a), *RB1* (b), *MAP2K4* (c), *NF1* (d), *SMAD4* (e), *LINC00290* (f) and *PTEN* (g).

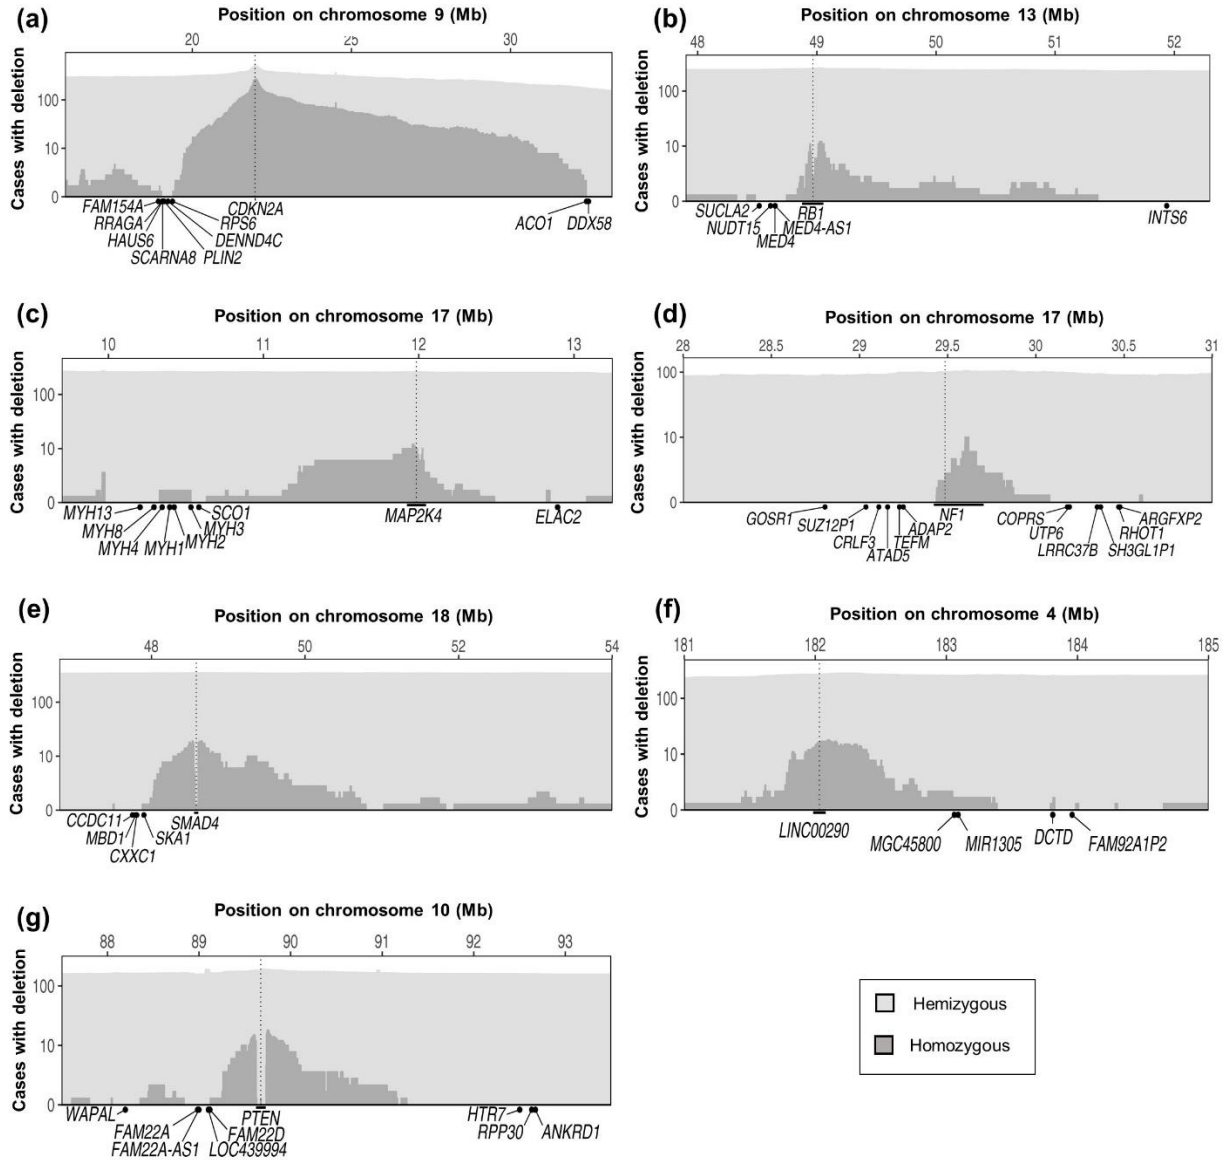

## Supplementary Figure 6

Patterns of hemizygous and homozygous deletion across copy number profiles of 2,476 samples from Tumorscape for the seven regions where we identified deletion limitation in TCGA and CCLE. In Tumorscape, we observed deletion patterns similar to those observed in TCGA and CCLE at *CDKN2A* (a), *MAP2K4* (c) and *PTEN* (g), whereas the *RBI* region (b) showed slightly different patterns on the *p*-terminal side and for the remaining loci *NF1* (d), *SMAD4* (e) and *LINC00290* (f) there were not sufficient cases with homozygous deletions.

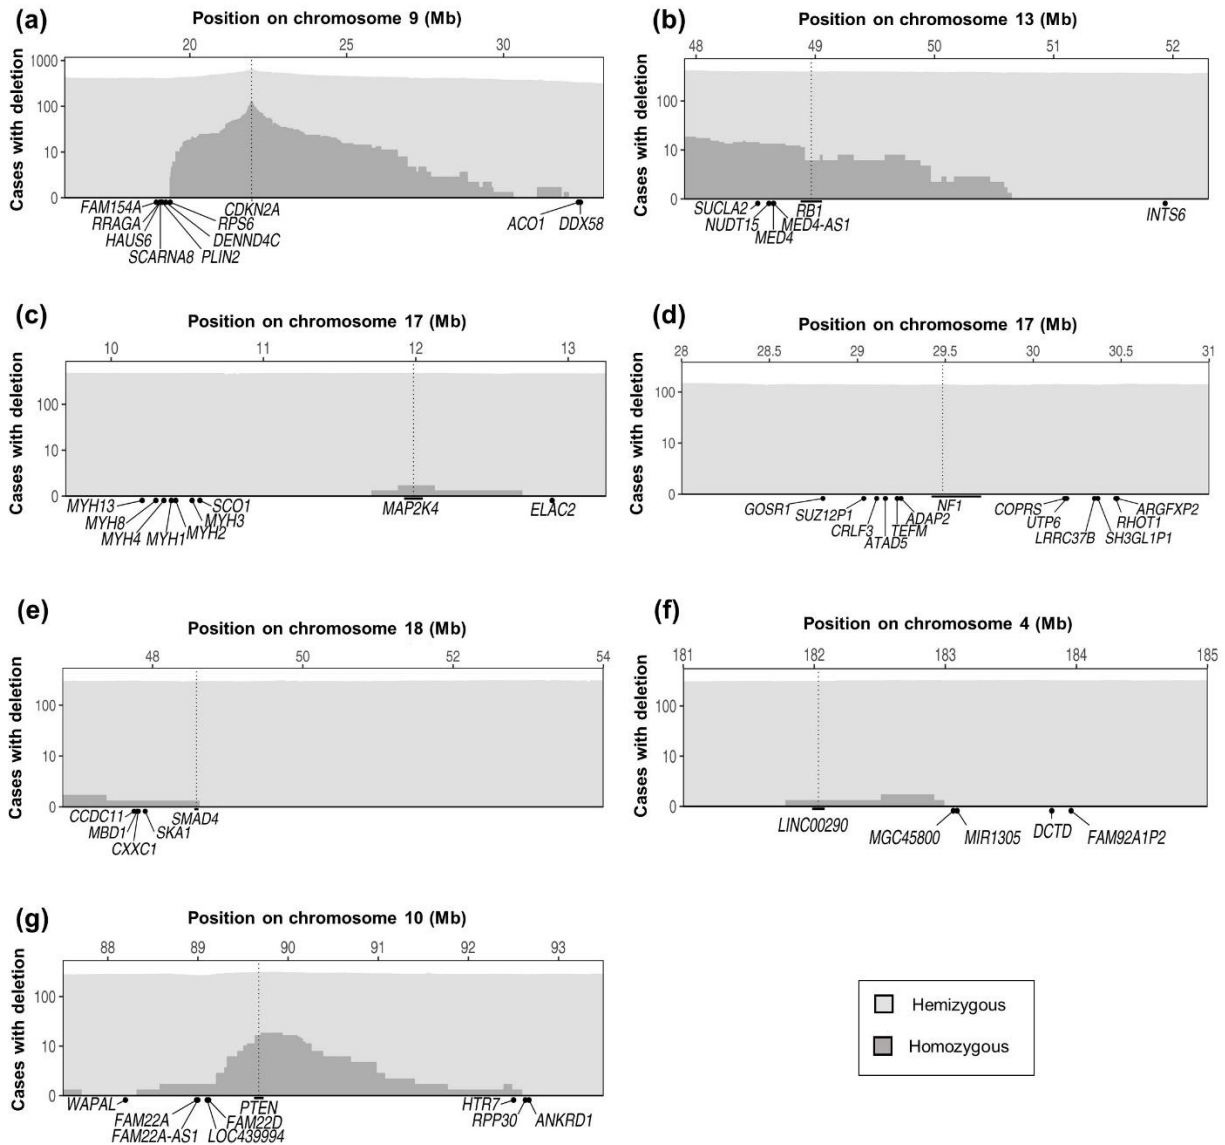

## Supplementary Figure 7

**Mapping of EGs in the *CDKN2A* region using CRISPR/Cas9 in Jurkat cells.** The strongest DLS scores were found in the *CDKN2A* region on 9p21. For further validation of essentiality, and to clarify which are essential on the q-terminal side, we carried out a focused CRISPR/Cas9 screen of 68 genes in the region in Jurkat and RCH-ACV cells. **(a)** Overview of hemizygous and homozygous deletion frequency across the *CDKN2A* region (TCGA dataset). **(b), (c)** Detailed overview of the p- and q-terminal deletion limit points. Black dots at the lower part of the figure represent sgRNA sequences showing <25% depletion by day 14. Blue diamonds illustrate sgRNAs showing >25% depletion. For the p-terminal conserved region, we saw depletion of sgRNAs towards *HAUS6* and *RPS6*. For the q-terminal conserved region, we saw depletion of sgRNAs towards *DNAJA1*, *SMU1* and *NOL6*.

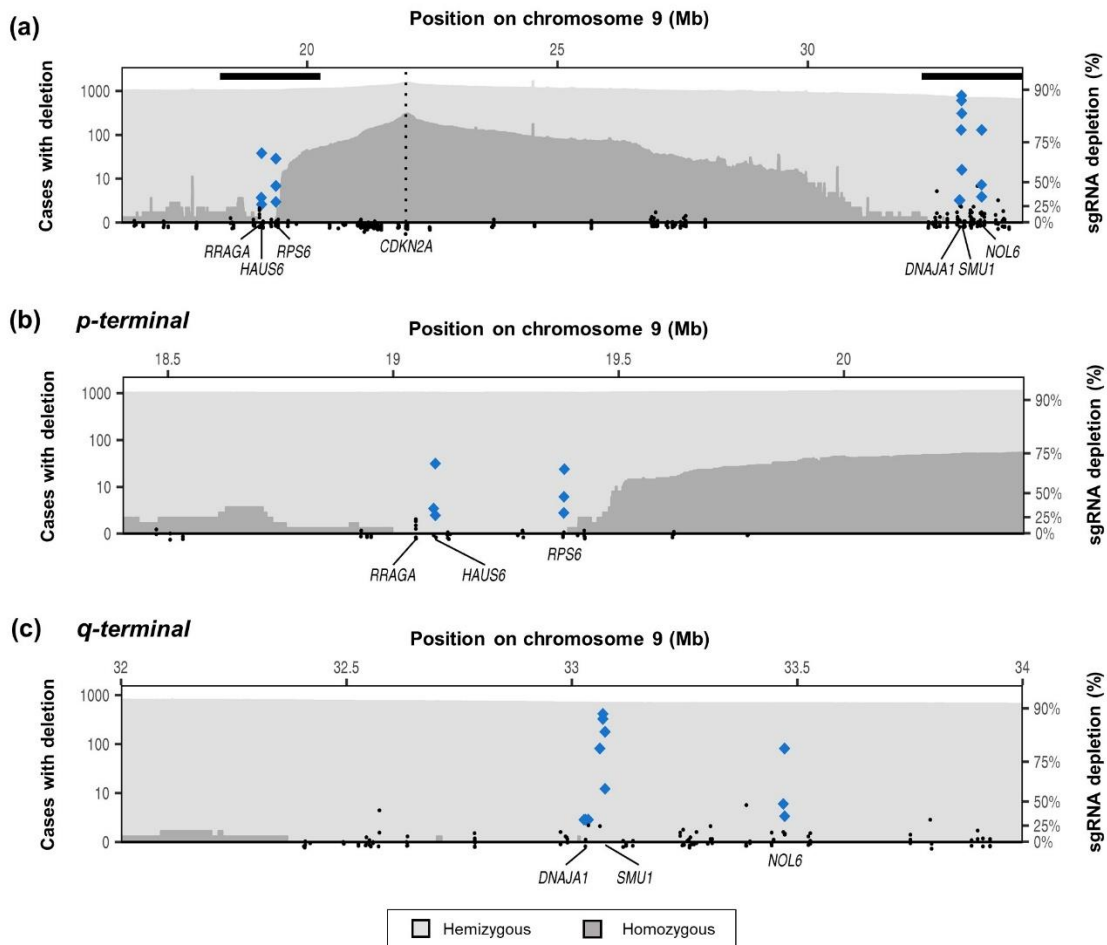

## Supplementary Figure 8

Mapping of EGs in the *CDKN2A* region using CRISPR/Cas9 in RCH-ACV cells. (a) Overview of hemizygous and homozygous deletion frequency across the *CDKN2A* region (TCGA dataset). (b),(c) Detailed overview of the p- and q-terminal deletion limit points. Black dots at the lower part of the figure represent sgRNA sequences with a depletion lower than 25% by day 14. Blue diamonds illustrate sgRNAs showing >25% depletion. In the p-terminal conserved region, we observed depletion of sgRNAs towards *RRAGA*, *HAUS6* and *RPS6*. In the q-terminal conserved region, we observed depletion of sgRNAs towards *SMU1* and *NOL6*.

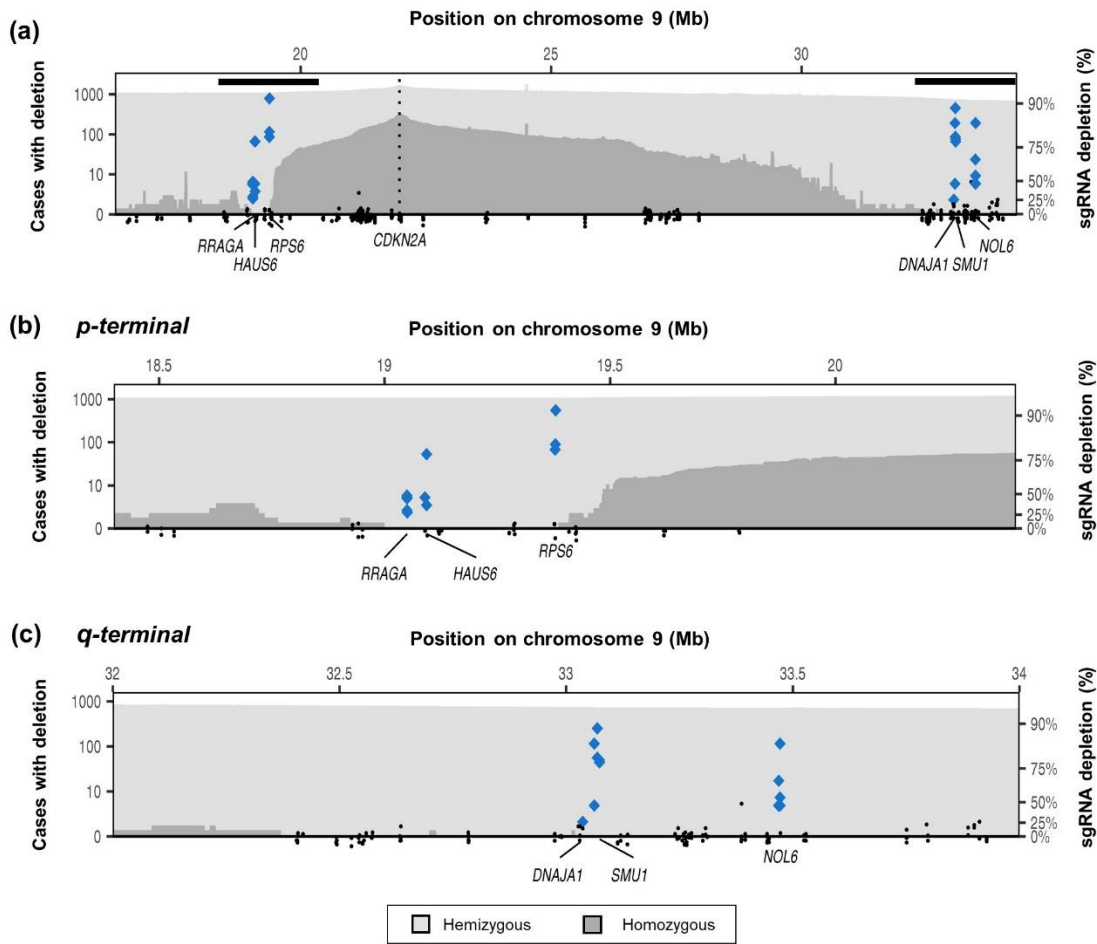



# Supplementary Figure 9

**Associations between gene expression and DNA copy number.** Correlation plots between copy number and mRNA expression for the identified deletion-limiting genes. As shown, hemizygous deletion of these genes reduces expression in most cases.

## 9p21.3 *CDKN2A*

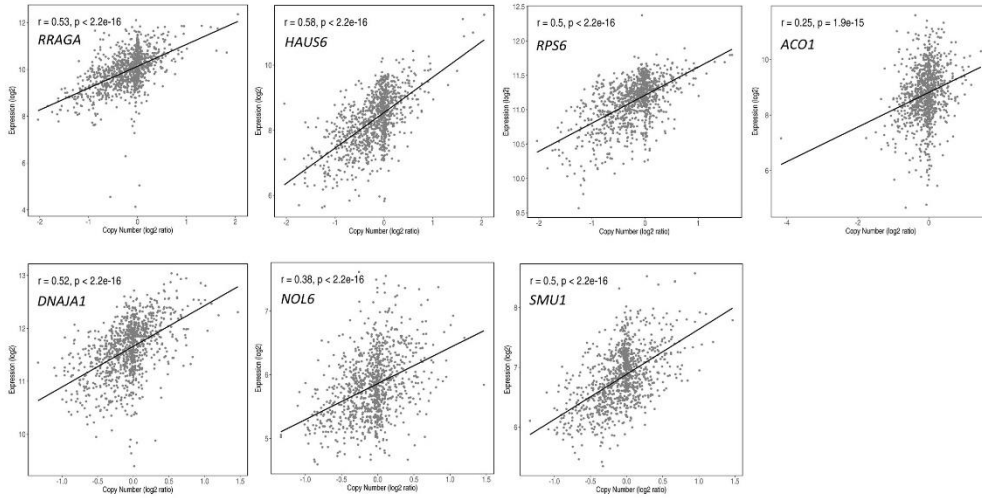

## 10q23.31 *PTEN*

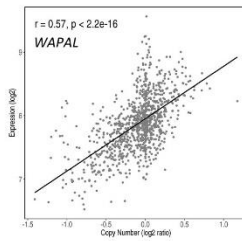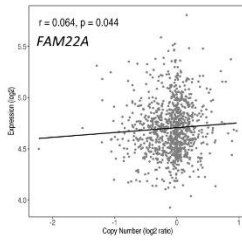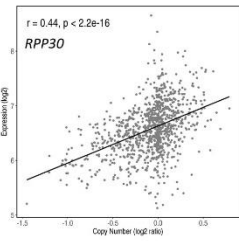

## 18q21.2 *SMAD4*

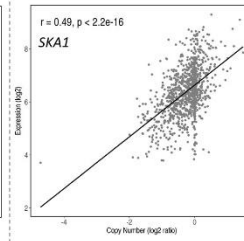

## 13q14.2 *RB1*

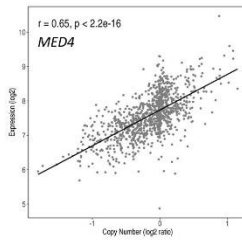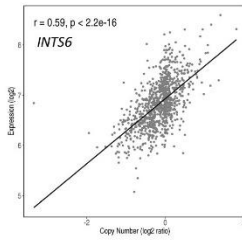

## 17p12 *MAP2K4*

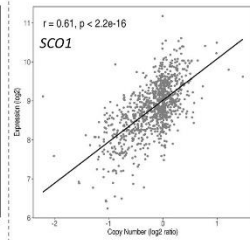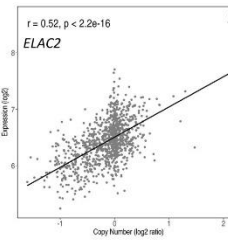

## 17q11.2 *NF1*

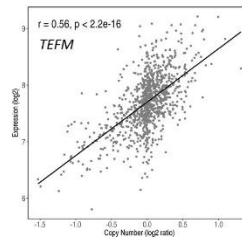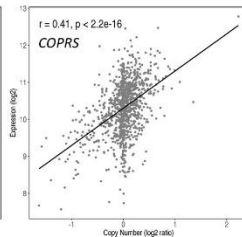

## 4q34.3 *LINCO0290*

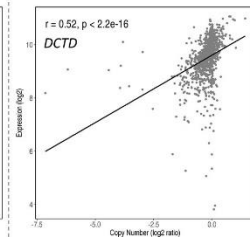

## Supplementary Table 1

**DLS scores in the CCLE and Tumorscape datasets.** The candidate deletion-limiting genes identified in the TCGA dataset show a DLS>0.8 (*r*) within a 0.5-, 1- and/or 2-Mb neighborhood. Positive and negative *r*-values indicate candidate genes at the *p*- and *q*-terminal, respectively. Using 200-fold bootstrapping, we estimated 90% confidence intervals (90%CI).

| GeneSymbol              | Chr | Start     | End       | 0.5Mb |                |    |            |                |    | 1Mb    |                  |    |            |                |    | 2Mb    |                  |    |            |                   |    |
|-------------------------|-----|-----------|-----------|-------|----------------|----|------------|----------------|----|--------|------------------|----|------------|----------------|----|--------|------------------|----|------------|-------------------|----|
|                         |     |           |           | CCLE  |                |    | Tumorscape |                |    | CCLE   |                  |    | Tumorscape |                |    | CCLE   |                  |    | Tumorscape |                   |    |
|                         |     |           |           | r     | 90%CI          | N  | r          | 90%CI          | N  | r      | 90%CI            | N  | r          | 90%CI          | N  | r      | 90%CI            | N  | r          | 90%CI             | N  |
| <b>4q34.3 LINC00290</b> |     |           |           |       |                |    |            |                |    |        |                  |    |            |                |    |        |                  |    |            |                   |    |
| <i>LOC90768*</i>        | 4   | 183060158 | 183065668 |       |                |    |            |                |    | -0,979 | [-0.984, -0.921] | 17 | -0,756     | [-0.918, 0]    | 2  |        |                  |    |            |                   |    |
| <i>MIR1305*</i>         | 4   | 183090445 | 183090531 |       |                |    |            |                |    | -0,976 | [-0.983, -0.912] | 17 | -0,773     | [-0.925, 0]    | 2  |        |                  |    |            |                   |    |
| <i>DCTD</i>             | 4   | 183811243 | 183838630 |       |                |    |            |                |    |        |                  |    |            |                |    | -0,927 | [-0.951, -0.864] | 17 | -0,835     | [-0.931, 0.685]   | 2  |
| <i>FAM92AIP2*</i>       | 4   | 183958817 | 183961272 |       |                |    |            |                |    |        |                  |    |            |                |    | -0,835 | [-0.925, -0.734] | 15 | -0,832     | [-0.911, 0.635]   | 2  |
| <b>9p21.3 CDKN2A</b>    |     |           |           |       |                |    |            |                |    |        |                  |    |            |                |    |        |                  |    |            |                   |    |
| <i>FAM154A</i>          | 9   | 18927890  | 19033256  |       |                |    |            |                |    | 0,782  | [0.481, 0.910]   | 12 | 0,974      | [0.943, 0.977] | 17 | 0,952  | [0.902, 0.976]   | 49 | 0,990      | [0.974, 0.993]    | 28 |
| <i>RRAGA</i>            | 9   | 19049371  | 19051021  |       |                |    |            |                |    | 0,793  | [0.514, 0.912]   | 12 | 0,978      | [0.949, 0.98]  | 18 | 0,953  | [0.899, 0.977]   | 51 | 0,990      | [0.973, 0.994]    | 28 |
| <i>HAUS6</i>            | 9   | 19053134  | 19102940  |       |                |    |            |                |    | 0,829  | [0.604, 0.933]   | 12 | 0,987      | [0.963, 0.987] | 20 | 0,958  | [0.907, 0.980]   | 51 | 0,991      | [0.973, 0.994]    | 31 |
| <i>SCARNA8*</i>         | 9   | 19063653  | 19063784  |       |                |    |            |                |    | 0,801  | [0.536, 0.917]   | 12 | 0,980      | [0.953, 0.982] | 18 |        |                  |    |            |                   |    |
| <i>PLIN2</i>            | 9   | 19115758  | 19127604  |       |                |    |            |                |    | 0,871  | [0.737, 0.951]   | 13 | 0,990      | [0.97, 0.989]  | 20 | 0,961  | [0.911, 0.981]   | 54 | 0,990      | [0.973, 0.994]    | 31 |
| <i>DENND4C</i>          | 9   | 19230762  | 19374137  | 0,978 | [0.845, 0.986] | 8  | 0,978      | [0.944, 0.989] | 16 | 0,965  | [0.909, 0.986]   | 21 | 0,985      | [0.959, 0.993] | 23 | 0,963  | [0.930, 0.980]   | 83 | 0,983      | [0.964, 0.99]     | 46 |
| <i>RPS6</i>             | 9   | 19376253  | 19380235  | 0,980 | [0.852, 0.986] | 8  | 0,977      | [0.943, 0.988] | 16 | 0,977  | [0.926, 0.988]   | 22 | 0,984      | [0.958, 0.993] | 23 | 0,959  | [0.919, 0.977]   | 83 | 0,983      | [0.964, 0.99]     | 47 |
| <i>ACO1</i>             | 9   | 32384600  | 32450832  |       |                |    |            |                |    |        |                  |    |            |                |    | -0,973 | [-0.986, -0.926] | 13 | -0,495     | [-0.495, -0.0831] | 2  |
| <i>DDX58</i>            | 9   | 32455299  | 32526322  |       |                |    |            |                |    |        |                  |    |            |                |    | -0,977 | [-0.987, -0.934] | 13 | -0,534     | [-0.534, -0.0985] | 2  |
| <b>10q23.31 PTEN</b>    |     |           |           |       |                |    |            |                |    |        |                  |    |            |                |    |        |                  |    |            |                   |    |
| <i>WAPAL</i>            | 10  | 88195012  | 88281541  |       |                |    |            |                |    |        |                  |    |            |                |    | 0,831  | [0.727, 0.864]   | 17 | 0,921      | [-0.22, 0.972]    | 16 |
| <i>FAM22A</i>           | 10  | 88985204  | 88994733  | 0,905 | [0.660, 0.956] | 6  | 0,980      | [0.87, 0.984]  | 7  | 0,880  | [0.822, 0.894]   | 17 | 0,989      | [0.96, 0.99]   | 17 |        |                  |    |            |                   |    |
| <i>FAM22A-AS1*</i>      | 10  | 88998423  | 89102315  | 0,964 | [0.700, 0.982] | 11 | 0,995      | [0.946, 0.993] | 9  | 0,859  | [0.775, 0.892]   | 17 | 0,981      | [0.952, 0.987] | 17 |        |                  |    |            |                   |    |

|                     |    |          |          |        |                 |    |        |                  |   |        |                  |    |        |                |    |        |                  |    |        |                  |   |
|---------------------|----|----------|----------|--------|-----------------|----|--------|------------------|---|--------|------------------|----|--------|----------------|----|--------|------------------|----|--------|------------------|---|
| <i>LOC439994</i>    | 10 | 89102167 | 89103331 | 0,964  | [0.702, 0.982]  | 11 | 0,991  | [0.939, 0.99]    | 8 | 0,858  | [0.774, 0.892]   | 17 | 0,980  | [0.952, 0.986] | 17 |        |                  |    |        |                  |   |
| <i>FAM22D</i>       | 10 | 89117476 | 89130452 | 0,953  | [0.729, 0.967]  | 11 | 0,994  | [0.951, 0.992]   | 8 | 0,844  | [0.751, 0.885]   | 17 | 0,975  | [0.943, 0.983] | 17 |        |                  |    |        |                  |   |
| <i>HTR7</i>         | 10 | 92500575 | 92617671 |        |                 |    |        |                  |   |        |                  |    |        |                |    | -0,842 | [-0.853, -0.526] | 5  | -0,969 | [-0.98, -0.845]  | 7 |
| <i>RPP30</i>        | 10 | 92631708 | 92668312 |        |                 |    |        |                  |   |        |                  |    |        |                |    | -0,789 | [-0.803, -0.366] | 4  | -0,960 | [-0.975, -0.79]  | 7 |
| <i>ANKRD1</i>       | 10 | 92671856 | 92681032 |        |                 |    |        |                  |   |        |                  |    |        |                |    | -0,769 | [-0.784, -0.359] | 4  | -0,958 | [-0.976, -0.773] | 7 |
| <b>13q14.2 RB1</b>  |    |          |          |        |                 |    |        |                  |   |        |                  |    |        |                |    |        |                  |    |        |                  |   |
| <i>SUCLA2</i>       | 13 | 48516790 | 48575462 | 0,859  | [0.734, 0.925]  | 10 | -0,917 | [-0.965, -0.774] | 9 |        |                  |    |        |                |    |        |                  |    |        |                  |   |
| <i>NUDT15</i>       | 13 | 48611702 | 48621282 | 0,895  | [0.746, 0.950]  | 10 | -0,891 | [-0.961, -0.688] | 9 |        |                  |    |        |                |    |        |                  |    |        |                  |   |
| <i>MED4</i>         | 13 | 48649863 | 48669277 | 0,896  | [0.696, 0.954]  | 10 | -0,886 | [-0.965, -0.672] | 7 |        |                  |    |        |                |    |        |                  |    |        |                  |   |
| <i>MED4-AS1*</i>    | 13 | 48651272 | 48654129 | 0,898  | [0.710, 0.956]  | 10 | -0,886 | [-0.964, -0.673] | 7 |        |                  |    |        |                |    |        |                  |    |        |                  |   |
| <b>17p12 MAP2K4</b> |    |          |          |        |                 |    |        |                  |   |        |                  |    |        |                |    |        |                  |    |        |                  |   |
| <i>MYH13</i>        | 17 | 10204182 | 10276322 |        |                 |    |        |                  |   |        |                  |    |        |                |    | 0,891  | [0.780, 0.940]   | 11 | 0,747  | [0, 0.79]        | 2 |
| <i>MYH8</i>         | 17 | 10293641 | 10325267 |        |                 |    |        |                  |   |        |                  |    |        |                |    | 0,873  | [0.751, 0.933]   | 11 | 0,764  | [0, 0.812]       | 2 |
| <i>MYH4</i>         | 17 | 10346607 | 10372876 |        |                 |    |        |                  |   |        |                  |    |        |                |    | 0,857  | [0.726, 0.925]   | 11 | 0,779  | [0, 0.831]       | 2 |
| <i>MYH1</i>         | 17 | 10395626 | 10421859 |        |                 |    |        |                  |   |        |                  |    |        |                |    | 0,835  | [0.698, 0.908]   | 11 | 0,792  | [0, 0.849]       | 2 |
| <i>MYH2</i>         | 17 | 10424464 | 10452940 |        |                 |    |        |                  |   |        |                  |    |        |                |    | 0,820  | [0.681, 0.899]   | 11 | 0,800  | [0, 0.859]       | 2 |
| <i>MYH3</i>         | 17 | 10531842 | 10560626 |        |                 |    |        |                  |   |        |                  |    |        |                |    | 0,755  | [0.623, 0.834]   | 11 | 0,823  | [0, 0.889]       | 2 |
| <i>SCO1</i>         | 17 | 10583648 | 10600885 |        |                 |    |        |                  |   |        |                  |    |        |                |    | 0,727  | [0.600, 0.805]   | 11 | 0,831  | [0, 0.898]       | 2 |
| <i>ELAC2</i>        | 17 | 12894928 | 12921381 |        |                 |    |        |                  |   | -0,869 | [-0.939, -0.675] | 11 | -0,969 | [-0.969, 0]    | 2  |        |                  |    |        |                  |   |
| <b>17q11.2 NF1</b>  |    |          |          |        |                 |    |        |                  |   |        |                  |    |        |                |    |        |                  |    |        |                  |   |
| <i>GOSR1</i>        | 17 | 28804425 | 28853832 |        |                 |    |        |                  |   | 0,827  | [0.713, 0.856]   | 9  | 0      | [0, 0]         | 0  |        |                  |    |        |                  |   |
| <i>SUZ12P1</i>      | 17 | 29036625 | 29097068 | 0,812  | [0.663, 0.821]  | 8  | 0      | [0, 0]           | 0 |        |                  |    |        |                |    |        |                  |    |        |                  |   |
| <i>CRLF3</i>        | 17 | 29109701 | 29151778 | 0,882  | [0.76, 0.892]   | 9  | 0      | [0, 0]           | 0 |        |                  |    |        |                |    |        |                  |    |        |                  |   |
| <i>ATAD5</i>        | 17 | 29159022 | 29222295 | 0,922  | [0.82, 0.937]   | 9  | 0      | [0, 0]           | 0 |        |                  |    |        |                |    |        |                  |    |        |                  |   |
| <i>TEFM</i>         | 17 | 29226000 | 29233286 | 0,921  | [0.813, 0.939]  | 9  | 0      | [0, 0]           | 0 |        |                  |    |        |                |    |        |                  |    |        |                  |   |
| <i>ADAP2</i>        | 17 | 29248753 | 29286211 | 0,910  | [0.778, 0.952]  | 9  | 0      | [0, 0]           | 0 |        |                  |    |        |                |    |        |                  |    |        |                  |   |
| <i>COPRS</i>        | 17 | 30178883 | 30186326 | -0,959 | [-0.979, -0.81] | 5  | 0      | [0, 0]           | 0 |        |                  |    |        |                |    |        |                  |    |        |                  |   |
| <i>LRRC37B</i>      | 17 | 30348154 | 30380519 |        |                 |    |        |                  |   | -0,732 | [-0.803, 0.595]  | 8  | 0      | [0, 0]         | 0  |        |                  |    |        |                  |   |

|                      |    |          |          |  |  |  |        |                  |    |        |                   |   |
|----------------------|----|----------|----------|--|--|--|--------|------------------|----|--------|-------------------|---|
| <i>SH3GLIP1*</i>     | 17 | 30367354 | 30369851 |  |  |  | -0,752 | [-0.827, -0.490] | 8  | 0      | [0, 0]            | 0 |
| <i>RHOT1</i>         | 17 | 30469472 | 30552746 |  |  |  | -0,827 | [-0.920, -0.574] | 8  | 0      | [0, 0]            | 0 |
| <i>ARGFXP2*</i>      | 17 | 30477386 | 30478590 |  |  |  | -0,826 | [-0.922, -0.599] | 8  | 0      | [0, 0]            | 0 |
| <b>18q21.2 SMAD4</b> |    |          |          |  |  |  |        |                  |    |        |                   |   |
| <i>CCDC11</i>        | 18 | 47753562 | 47792865 |  |  |  | 0,935  | [0.902, 0.940]   | 18 | -0,950 | [-0.962, -0.399]  | 2 |
| <i>MBD1</i>          | 18 | 47793251 | 47808144 |  |  |  | 0,934  | [0.901, 0.940]   | 18 | -0,954 | [-0.965, -0.221]  | 2 |
| <i>CXXC1</i>         | 18 | 47808712 | 47814692 |  |  |  | 0,933  | [0.900, 0.940]   | 18 | -0,955 | [-0.966, -0.0574] | 2 |
| <i>SKA1</i>          | 18 | 47901391 | 47920538 |  |  |  | 0,903  | [0.851, 0.925]   | 18 | -0,959 | [-0.968, 0]       | 2 |

\* non protein coding gene

## Supplementary Table 2

**Gene dependency scores for the identified deletion-limiting genes.** This table show data from genome-wide CRISPR loss-of-function screens from the Cancer Dependency Map<sup>20,38</sup> (DepMap AVANA 19Q1; 558 cell lines) and pooled shRNA knockdown screens<sup>2,5,47</sup> (shARP<sup>5</sup> and Achilles<sup>47</sup>) for the identified genes. Negative AVANA scores indicate depletion by sgRNA targeting the gene during culture. Low mean Achilles and shARP scores in copy number loss (CNL) compared to copy number-neutral (CN) cell lines indicates copy number-dependent sensitivity to further suppression of the activity of a gene by shRNA.

| GeneSymbol              | Chr | Start     | End       | DepMap           | Achilles                  |                          | shARP                     |                          |
|-------------------------|-----|-----------|-----------|------------------|---------------------------|--------------------------|---------------------------|--------------------------|
|                         |     |           |           | Dependency score | CNL mean dependence score | CN mean dependence score | CNL mean dependence score | CN mean dependence score |
| <b>4q34.3 LINC00290</b> |     |           |           | -                | -                         | -                        | -                         | -                        |
| <i>LOC90768</i> *       | 4   | 183060158 | 183065668 | -                | -                         | -                        | -                         | -                        |
| <i>MIR1305</i> *        | 4   | 183090445 | 183090531 | -                | -                         | -                        | -                         | -                        |
| <i>DCTD</i>             | 4   | 183811243 | 183838630 | 0,1280           | -0,076                    | -0,024                   | 0,262                     | 0,243                    |
| <i>FAM92A1P2</i> *      | 4   | 183958817 | 183961272 | -                | -                         | -                        | -                         | -                        |
| <b>9p21.3 CDKN2A</b>    |     |           |           |                  |                           |                          |                           |                          |
| <i>FAM154A</i>          | 9   | 18927890  | 19033256  | -0,162           | -                         | -                        | -                         | -                        |
| <i>RRAGA</i>            | 9   | 19049371  | 19051021  | -0,376           | -0,021                    | 0,043                    | -                         | -                        |
| <i>HAUS6</i>            | 9   | 19053134  | 19102940  | <b>-0,853</b>    | -                         | -                        | -0,839                    | 0,623                    |
| <i>SCARNA8</i> *        | 9   | 19063653  | 19063784  | -                | -                         | -                        | -                         | -                        |
| <i>PLIN2</i>            | 9   | 19115758  | 19127604  | -0,136           | -                         | -                        | -                         | -                        |
| <i>DENND4C</i>          | 9   | 19230762  | 19374137  | 0,002            | -                         | -                        | -                         | -                        |
| <i>RPS6</i>             | 9   | 19376253  | 19380235  | <b>-1,259</b>    | -0,071                    | -0,165                   | <b>-0,769</b>             | <b>1,084</b>             |
| <i>ACO1</i>             | 9   | 32384600  | 32450832  | 0,088            | -0,243                    | -0,129                   | -0,255                    | 0,029                    |
| <i>DDX58</i>            | 9   | 32455299  | 32526322  | -0,019           | -                         | -                        | -                         | -                        |
| <i>DNAJAI</i>           | 9   | 33025211  | 33039907  | -0,408           | -                         | -                        | -0,592                    | -0,017                   |
| <i>SMU1</i>             | 9   | 33041764  | 33076716  | <b>-1,411</b>    | <b>-0,721</b>             | 0,164                    | <b>-2,006</b>             | 0,796                    |
| <i>NOL6</i>             | 9   | 33461353  | 33473943  | <b>-0,930</b>    | -                         | -                        | -0,049                    | -0,143                   |
| <b>10q23.31 PTEN</b>    |     |           |           |                  |                           |                          |                           |                          |
| <i>WAPAL</i>            | 10  | 88195012  | 88281541  | -0,221           | -                         | -                        | -                         | -                        |
| <i>FAM22A</i>           | 10  | 88985204  | 88994733  | -0,172           | -                         | -                        | -                         | -                        |
| <i>FAM22A-AS1</i> *     | 10  | 88998423  | 89102315  | -                | -                         | -                        | -                         | -                        |
| <i>LOC439994</i>        | 10  | 89102167  | 89103331  | -                | -                         | -                        | -                         | -                        |
| <i>FAM22D</i>           | 10  | 89117476  | 89130452  | -                | -                         | -                        | -0,001                    | -0,077                   |
| <i>HTR7</i>             | 10  | 92500575  | 92617671  | -0,225           | -0,054                    | -0,148                   | -0,246                    | 0,032                    |
| <i>RPP30</i>            | 10  | 92631708  | 92668312  | <b>-0,933</b>    | -                         | -                        | -                         | -                        |
| <i>ANKRD1</i>           | 10  | 92671856  | 92681032  | 0,061            | -                         | -                        | <b>-1,025</b>             | -0,199                   |
| <b>13q14.2 RBI</b>      |     |           |           |                  |                           |                          |                           |                          |
| <i>SUCLA2</i>           | 13  | 48516790  | 48575462  | -0,162           | -                         | -                        | -                         | -                        |
| <i>NUDT15</i>           | 13  | 48611702  | 48621282  | -0,075           | -                         | -                        | -0,069                    | 0,015                    |
| <i>MED4</i>             | 13  | 48649863  | 48669277  | <b>-0,845</b>    | -                         | -                        | -0,188                    | 0,022                    |
| <i>MED4-AS1</i> *       | 13  | 48651272  | 48654129  | -                | -                         | -                        | -                         | -                        |

|                      |    |          |          |               |        |        |        |               |
|----------------------|----|----------|----------|---------------|--------|--------|--------|---------------|
| <i>INTS6</i>         | 13 | 51353862 | 51454264 | <b>-0,714</b> | -      | -      | -0,234 | -0,165        |
| <b>17p12 MAP2K4</b>  |    |          |          |               |        |        |        |               |
| <i>MYH13</i>         | 17 | 10204182 | 10276322 | 0,028         | -      | -      | -      | -             |
| <i>MYH8</i>          | 17 | 10293641 | 10325267 | -0,018        | -      | -      | -      | -             |
| <i>MYH4</i>          | 17 | 10346607 | 10372876 | 0,071         | -      | -      | -      | -             |
| <i>MYH1</i>          | 17 | 10395626 | 10421859 | 0,073         | -      | -      | -0,023 | -0,062        |
| <i>MYH2</i>          | 17 | 10424464 | 10452940 | -0,121        | -      | -      | -      | -             |
| <i>MYH3</i>          | 17 | 10531842 | 10560626 | -0,142        | -      | -      | -      | -             |
| <i>SCO1</i>          | 17 | 10583648 | 10600885 | -0,301        | -0,070 | -0,102 | 0,100  | <b>-0,734</b> |
| <i>ELAC2</i>         | 17 | 12894928 | 12921381 | <b>-0,766</b> | -0,051 | 0,014  | -0,770 | 0,177         |
| <b>17q11.2 NFI</b>   |    |          |          |               |        |        |        |               |
| <i>GOSR1</i>         | 17 | 28804425 | 28853832 | -0,040        | 0,035  | 0,056  | -      | -             |
| <i>SUZ12P1</i>       | 17 | 29036625 | 29097068 | -             | -      | -      | -      | -             |
| <i>CRLF3</i>         | 17 | 29109701 | 29151778 | -0,094        | -0,084 | -0,127 | -0,028 | -0,063        |
| <i>ATAD5</i>         | 17 | 29159022 | 29222295 | -0,116        | -      | -      | -0,092 | 0,004         |
| <i>TEFM</i>          | 17 | 29226000 | 29233286 | -0,352        | -      | -      | -      | -             |
| <i>ADAP2</i>         | 17 | 29248753 | 29286211 | -0,195        | -      | -      | -      | -             |
| <i>COPRS</i>         | 17 | 30178883 | 30186326 | -0,133        | -      | -      | -      | -             |
| <i>UTP6</i>          | 17 | 30190189 | 30228729 | -0,377        | -      | -      | -      | -             |
| <i>LRRC37B</i>       | 17 | 30348154 | 30380519 | -0,489        | -      | -      | -      | -             |
| <i>SH3GLIP1</i> *    | 17 | 30367354 | 30369851 | -             | -      | -      | -      | -             |
| <i>RHOT1</i>         | 17 | 30469472 | 30552746 | -0,122        | -      | -      | -      | -             |
| <i>ARGFXP2</i> *     | 17 | 30477386 | 30478590 | -             | -      | -      | -      | -             |
| <b>18q21.2 SMAD4</b> |    |          |          |               |        |        |        |               |
| <i>CCDC11</i>        | 18 | 47753562 | 47792865 | 0,152         | -      | -      | -0,027 | 0,022         |
| <i>MBD1</i>          | 18 | 47793251 | 47808144 | 0,084         | -0,050 | 0,101  | -      | -             |
| <i>CXXC1</i>         | 18 | 47808712 | 47814692 | -0,453        | -      | -      | -0,535 | -0,026        |
| <i>SKA1</i>          | 18 | 47901391 | 47920538 | -0,484        | -0,301 | -0,052 | -      | -             |

\* non protein coding gene

## Supplementary Table 3

The sgRNA sequences used for fine-mapping essential genes in the *CDKN2A* region.

| gene_id         | UID          | sgRNA nr | Strand | Start    | End      | 5'-3'                     | 5'-3'                      |
|-----------------|--------------|----------|--------|----------|----------|---------------------------|----------------------------|
| <i>ACER2</i>    | HGLibB_00430 | 1        | +      | 19424717 | 19424736 | CACCGCCATGCAACCCTTAGTTTCT | AAACAGAACTAAGGGTTGCATGGC   |
| <i>ACER2</i>    | HGLibB_00431 | 2        | -      | 19424729 | 19424748 | CACCGCATCTGACCCAAGAACTA   | AAACTAGTTTCTTGGGTCAGATGCC  |
| <i>ACER2</i>    | HGLibB_00432 | 3        | -      | 19423894 | 19423913 | CACCGACGAAACAAGCACATGCAGA | AAACTCTGCATGTGCTTGTTCGTC   |
| <i>ACER2</i>    | HGLibA_00430 | 4        | +      | 19409169 | 19409188 | CACCGTATCGCCGAGTTCTACAACA | AAACTGTTGTAGAACTCGGCGATAC  |
| <i>ACER2</i>    | HGLibA_00431 | 5        | -      | 19409177 | 19409196 | CACCGCCGCACCGTGTGTAGAACT  | AAACAGTTCTACAACACGGTGGCGC  |
| <i>ACER2</i>    | HGLibA_00432 | 6        | +      | 19423943 | 19423962 | CACCGCTACTTAATCTGGACTCTTT | AAACAAAGAGTCCAGATTAAGTAGC  |
| <i>ACO1</i>     | HGLibA_00460 | 1        | -      | 32419150 | 32419169 | CACCGAATGGTGAGCACGATGTCAG | AAACCTGACATCGTGCTCACCATTC  |
| <i>ACO1</i>     | HGLibA_00461 | 2        | -      | 32407393 | 32407412 | CACCGATGACACGAGCAGGCTTAAA | AAACTTTAAGCCTGCTCGTGTATC   |
| <i>ACO1</i>     | HGLibA_00462 | 3        | +      | 32405519 | 32405538 | CACCGCGCACACCTTGCTGAGCCAT | AAACATGGCTCAGCAAGGTGTGCGC  |
| <i>ACO1</i>     | HGLibB_00460 | 4        | -      | 32407270 | 32407289 | CACCGAGAAGAACTCTGATCGAAAA | AAACTTTTCGATCAGAGTTCTTCTC  |
| <i>ACO1</i>     | HGLibB_00461 | 5        | -      | 32408603 | 32408622 | CACCGTGATCTATTACAAGATCAGC | AAACGCTGATCTTGTAAATAGATCAC |
| <i>ACO1</i>     | HGLibB_00462 | 6        | -      | 32408632 | 32408651 | CACCGACCTTCTGTGAAATCAACC  | AAACGGTTGATTCAACAGAAGGTC   |
| <i>ADAMTSL1</i> | HGLibB_00845 | 1        | +      | 18533234 | 18533253 | CACCGTTGCAACTTAGGAGCTGTGA | AAACTCACAGCTCCTAAGTTGCAAC  |
| <i>ADAMTSL1</i> | HGLibB_00846 | 2        | -      | 18533269 | 18533288 | CACCGCATTACTGCATGTTCTGTAT | AAACATACAGAACATGCAGTAATGC  |
| <i>ADAMTSL1</i> | HGLibB_00847 | 3        | -      | 18474245 | 18474264 | CACCGGTGTGCCAGGAGTTGCCCGA | AAACTCGGGCAACTCTGGCACACC   |
| <i>ADAMTSL1</i> | HGLibA_00847 | 4        | -      | 18504859 | 18504878 | CACCGAGGCATCCCATAGGCCGTCC | AAACGGACGGCCTATGGGATGCCTC  |
| <i>ADAMTSL1</i> | HGLibA_00848 | 5        | -      | 18504834 | 18504853 | CACCGCTCCTCGGAGCGTGCCGTCC | AAACGGACCGCACGCTCCGAGGAGC  |
| <i>ADAMTSL1</i> | HGLibA_00849 | 6        | +      | 18474226 | 18474245 | CACCGCAAGCATGGAATGCTGCCGT | AAACACGGCAGCATTCCATGCTTGC  |
| <i>ANKRD18B</i> | HGLibA_02020 | 1        | -      | 33524502 | 33524521 | CACCGCCAGGCGTCTCCCAAACTG  | AAACCAGTTTGGGAGACGCCTGGC   |
| <i>ANKRD18B</i> | HGLibA_02021 | 2        | -      | 33524550 | 33524569 | CACCGACCCCGACCCGCATACTCT  | AAACAGAGTATGCGGGTCGGGGGTC  |
| <i>ANKRD18B</i> | HGLibA_02022 | 3        | +      | 33529025 | 33529044 | CACCGGCCATTATTCTCTGAAACG  | AAACCGTTTCAGGAGAATAATGGCC  |
| <i>ANKRD18B</i> | HGLibB_02018 | 4        | -      | 33528797 | 33528816 | CACCGTCTGTACAGATGTTGATC   | AAACGATCAACATCTGTGACAGACC  |
| <i>ANKRD18B</i> | HGLibB_02019 | 5        | +      | 33529090 | 33529109 | CACCGCCATTATGCCGTGTAATG   | AAACCATTATACCGGCATAATGGC   |
| <i>APTX</i>     | HGLibA_02574 | 1        | -      | 32974534 | 32974553 | CACCGACATCTTCATGTGATCAGCC | AAACGGCTGATCACATGAAGATGTC  |
| <i>APTX</i>     | HGLibA_02575 | 2        | -      | 32989875 | 32989894 | CACCGGAGTGATGATGCGGGTGTGC | AAACGCACACCCGCATCATCACTCC  |
| <i>APTX</i>     | HGLibA_02576 | 3        | -      | 32989759 | 32989778 | CACCGAAGAAATGTTCTCGACAGCA | AAACTGCTGTGAGAACATTCTTC    |
| <i>APTX</i>     | HGLibB_02572 | 4        | -      | 32988104 | 32988123 | CACCGTTGAAAGCAGAGTGTAACA  | AAACTGTTACTCTGCTTTCAACC    |
| <i>APTX</i>     | HGLibB_02573 | 5        | +      | 32974537 | 32974556 | CACCGTGATCACATGAAGATGTACA | AAACTGTACATCTTCATGTGATCAC  |
| <i>APTX</i>     | HGLibB_02574 | 6        | -      | 32985986 | 32986005 | CACCGAGGCTTGAAGATTCTATGC  | AAACGCATAGAAATCTTCAAGCCTC  |
| <i>AQP3</i>     | HGLibA_02592 | 1        | -      | 33447472 | 33447491 | CACCGAGATGCTCCACATCCGCTAC | AAACGTAGCGGATGTGGAGCATCTC  |
| <i>AQP3</i>     | HGLibA_02593 | 2        | -      | 33447516 | 33447535 | CACCGCCCGCCATGGGTGACAGAGA | AAACTCTGTGACCCATGGCGGGGC   |
| <i>AQP3</i>     | HGLibA_02594 | 3        | +      | 33443394 | 33443413 | CACCGTGATCCAGGGCTACGAGCC  | AAACGGCTCGTGAGCCCTGGATCAC  |
| <i>AQP3</i>     | HGLibB_02590 | 4        | +      | 33443845 | 33443864 | CACCGTGCCCGGCTGAGCACAACC  | AAACGGTTGTGCTCAGCCGGGGCAC  |
| <i>AQP3</i>     | HGLibB_02591 | 5        | -      | 33443376 | 33443395 | CACCGCAAGCTGCCCATCTACACC  | AAACGGGTGTAGATGGGCAGCTTGC  |

|                |              |   |          |          |          |                           |                            |
|----------------|--------------|---|----------|----------|----------|---------------------------|----------------------------|
| <i>AQP3</i>    | HGLibB_02592 | 6 | -        | 33442887 | 33442906 | CACCGATCTTTGCTACCTACCCCTC | AAACGAGGGGTAGGTAGCAAAGATC  |
| <i>AQP7</i>    | HGLibA_02604 | 1 | +        | 33386493 | 33386512 | CACCGGCCAGCGCACAGTTAGCAA  | AAACTTGCTAACTGTGCGCTGGGCC  |
| <i>AQP7</i>    | HGLibA_02605 | 2 | -        | 33386498 | 33386517 | CACCGACCTTTGCTAACTGTGCGC  | AAACGCGCACAGTTAGCAAAGGTCC  |
| <i>AQP7</i>    | HGLibA_02606 | 3 | -        | 33395185 | 33395204 | CACCGCACTGTCTTAGGTCCACCCG | AAACCGGGTGGACCTAAGACAGTGC  |
| <i>AQP7</i>    | HGLibB_02602 | 4 | -        | 33386969 | 33386988 | CACCGCACGTGGCAGGCCGATCTC  | AAACGAGATGCGGCCTGCCACGTGC  |
| <i>AQP7</i>    | HGLibB_02603 | 5 | +        | 33395123 | 33395142 | CACCGTCTTCCTTGCAGTATTTC   | AAACGAAATACTGCAGAGGAAGAC   |
| <i>AQP7</i>    | HGLibB_02604 | 6 | +        | 33386977 | 33386996 | CACCGGCTGCCACGTGCACTCCA   | AAACTGGGAGTGCACGTGGCAGGCC  |
| <i>B4GALT1</i> | HGLibA_04022 | 1 | -        | 33120436 | 33120455 | CACCGACGGCACATTTCCGTTGCAA | AAACTGCAACGAAATGTGCCGTC    |
| <i>B4GALT1</i> | HGLibA_04023 | 2 | +        | 33135266 | 33135285 | CACCGTGTCTCTGCCGTTGCGGAA  | AAACTTCCGAACCGGCAGGAGCAC   |
| <i>B4GALT1</i> | HGLibA_04024 | 3 | -        | 33120473 | 33120492 | CACCGTGAATGACCATAATGCGTAC | AAACGTACGATTATGGTCATTAC    |
| <i>B4GALT1</i> | HGLibB_04020 | 4 | +        | 33135394 | 33135413 | CACCGCATGTTAAACTCAATCAGCA | AAACTGCTGATTGAGTTTAAATGC   |
| <i>B4GALT1</i> | HGLibB_04021 | 5 | +        | 33113463 | 33113482 | CACCGTCCCGATGTCCACTGTGATT | AAACAATCACAGTGGACATCGGGAC  |
| <i>B4GALT1</i> | HGLibB_04022 | 6 | -        | 33113562 | 33113581 | CACCGTGACCGAATTGCACACACAA | AAACTTGTGTGTGAATTCGGTCAC   |
| <i>BAG1</i>    | HGLibA_04073 | 1 | -        | 33255865 | 33255884 | CACCGAGGCTTGGTAAAAAGGTTC  | AAACGAACTTTTTTACCAAGCCTC   |
| <i>BAG1</i>    | HGLibA_04074 | 2 | -        | 33262763 | 33262782 | CACCGTGAACCAGTTGTCCAAGACC | AAACGGTCTTGGACAACCTGGTTCAC |
| <i>BAG1</i>    | HGLibA_04075 | 3 | -        | 33261095 | 33261114 | CACCGGGTTGCCGGGTCATGTTAAT | AAACATTAACATGACCCGGCAACCC  |
| <i>BAG1</i>    | HGLibB_04071 | 4 | +        | 33262736 | 33262755 | CACCGCTATGACCTCTTCAACAACC | AAACGGTTGTTGAAGAGGTCATAGC  |
| <i>BAG1</i>    | HGLibB_04072 | 5 | -        | 33261128 | 33261147 | CACCGAAACACCGTTGTCAGCACT  | AAACAGTGTGACAACGGTGTTC     |
| <i>BAG1</i>    | HGLibB_04073 | 6 | -        | 33258956 | 33258975 | CACCGGAGAAGATAGCTGACCAGC  | AAACGCTGGTCAGCTATCTTCTCCC  |
| <i>BNC2</i>    | HGLibA_04646 | 1 | -        | 16727856 | 16727875 | CACCGAGAACGACTACGGCTGAACC | AAACGGTTCAGCCGTAGTCGTTCTC  |
| <i>BNC2</i>    | HGLibA_04647 | 2 | +        | 16727870 | 16727889 | CACCGGTTCTGGTCCGAACCTGCA  | AAACTGCAGTTCGGAACCAGAACGC  |
| <i>BNC2</i>    | HGLibA_04648 | 3 | -        | 16583068 | 16583087 | CACCGTACAGCCATCCGTTGCACAC | AAACGTGTGCAACGGATGGCCTGAC  |
| <i>BNC2</i>    | HGLibB_04644 | 4 | +        | 16552681 | 16552700 | CACCGGCTGATGTCAAACACGACGT | AAACACGTCGTGTTTGACATCAGCC  |
| <i>BNC2</i>    | HGLibB_04645 | 5 | +        | 16552611 | 16552630 | CACCGGCTGAAGAGACGGTCCAGC  | AAACGCTGGACCGTCTTTCAGCGC   |
| <i>BNC2</i>    | HGLibB_04646 | 6 | +        | 16583002 | 16583021 | CACCGTACACTGATCACAAGTCTC  | AAACGAGGACTTGTGATCAGTGTAC  |
| <i>C9orf72</i> | HGLibA_06757 | 1 | -        | 27566790 | 27566809 | CACCGAATGGGGATCGCAGCACATA | AAACTATGTGCTGCGATCCCCATTC  |
| <i>C9orf72</i> | HGLibA_06758 | 2 | -        | 27558491 | 27558510 | CACCGCTTTGTACAAGGCCTGCTAA | AAACTTAGCAGGCCTTGTACAAAGC  |
| <i>C9orf72</i> | HGLibA_06759 | 3 | -        | 27562449 | 27562468 | CACCGAGTATTATTCCAATGCTTAC | AAACGTAAGCATTGGAATAATACTC  |
| <i>C9orf72</i> | HGLibB_06752 | 4 | +        | 27562437 | 27562456 | CACCGATCACTTCTCCAGTAAGCAT | AAACATGCTTACTGGAGAAGTGATC  |
| <i>C9orf72</i> | HGLibB_06753 | 5 | +        | 27566884 | 27566903 | CACCGCACCACTCTCTGCATTTCGA | AAACTCGAAATGCAGAGAGTGGTGC  |
| <i>C9orf72</i> | HGLibB_06754 | 6 | +        | 27558534 | 27558553 | CACCGTGATTCTGCTTCACATAACC | AAACGGTTATGTGAAGCAGAATCAC  |
| <i>CAAP1</i>   | HGLibA_06829 | 1 | -        | 26887354 | 26887373 | CACCGCAGCAGTGCTTCTGTATTAT | AAACATAATACAGAAGCACTGCTGC  |
| <i>CAAP1</i>   | HGLibA_06830 | 2 | +        | 26887303 | 26887322 | CACCGTGAAGTACCTTTAACACATC | AAACGATGTGTTAAAGGTACTTCAC  |
| <i>CAAP1</i>   | HGLibA_06831 | 3 | -        | 26884872 | 26884891 | CACCGTTTATAAGGTGACAATGGAA | AAACTTCCATTGTACCTTATAAAC   |
| <i>CAAP1</i>   | HGLibB_06824 | 4 | multiple | 26861084 | 26861103 | CACCGAGAGAGAATAAGCAACCTGA | AAACTCAGGTTGCTTATTCTCTCTC  |
| <i>CAAP1</i>   | HGLibB_06825 | 5 | -        | 26884841 | 26884860 | CACCGATGGAAGAGGAAGCAGATGA | AAACTCATCTGCTTCTCTTCCATC   |
| <i>CAAP1</i>   | HGLibB_06826 | 6 | -        | 26886153 | 26886172 | CACCGAGAAATTAATAAACTATGCC | AAACGGCATAGTTTTTAAATTTCTC  |
| <i>CDKN2A</i>  | HGLibA_08829 | 1 | +        | 21974684 | 21974703 | CACCGGGCTCCGACCGTAACTATT  | AAACAATAGTTACGGTCGGAGGCC   |
| <i>CDKN2A</i>  | HGLibA_08830 | 2 | +        | 21994282 | 21994301 | CACCGGGCCGACGCGCGCCGAATC  | AAACGATTCGGCGCGGTGCGGCC    |
| <i>CDKN2A</i>  | HGLibA_08831 | 3 | -        | 21971100 | 21971119 | CACCGGACCCGTGCACGACGCTGCC | AAACGGCAGCGTCGTGCACGGGTCC  |
| <i>CDKN2A</i>  | HGLibB_08822 | 4 | -        | 21994298 | 21994317 | CACCGTCTGGTGACCCTCCGGATT  | AAACAATCCGGAGGGTCCACCAAGAC |



|                |              |   |   |          |          |                            |                           |
|----------------|--------------|---|---|----------|----------|----------------------------|---------------------------|
| <i>CDKN2A</i>  | HGLibB_08823 | 5 | - | 21974696 | 21974715 | CACCGCCCAACGCACCGAATAGTTA  | AAACTAACTATTCGGTGCCTTGGGC |
| <i>CDKN2A</i>  | HGLibB_08824 | 6 | - | 21968726 | 21968745 | CACCGTTGTAGAAGCAGGCATGCGT  | AAACACGCATGCCTGCTTCTACAAC |
| <i>CDKN2B</i>  | HGLibA_08838 | 1 | + | 22008799 | 22008818 | CACCGGATCGCGCGCCTCCCGAAA   | AAACTTTCGGGAGGCGCGGATCCC  |
| <i>CDKN2B</i>  | HGLibA_08839 | 2 | + | 22006006 | 22006025 | CACCGGCAGGTACCCTGCAACGTCTG | AAACCGACGTTGCAGGGTACCTGCC |
| <i>CDKN2B</i>  | HGLibA_08840 | 3 | + | 22008824 | 22008843 | CACCGGACTCCGTTGGGATCCGCGC  | AAACGCGCGGATCCCAACGGAGTCC |
| <i>CDKN2B</i>  | HGLibB_08831 | 4 | - | 22006017 | 22006036 | CACCGCGGGGCCACCGGACGTTGC   | AAACGCAACGTCGCGGTGGCCCCG  |
| <i>CDKN2B</i>  | HGLibB_08832 | 5 | - | 22008816 | 22008835 | CACCGCCCAACGGAGTCAACCGTTT  | AAACAAACGGTTGACTCCGTTGGGC |
| <i>CDKN2B</i>  | HGLibB_08833 | 6 | + | 22008869 | 22008888 | CACCGTCCACTAGTCCCGCGCCG    | AAACCGGCGGGGACTAGTGGAGC   |
| <i>CHMP5</i>   | HGLibA_09495 | 1 | + | 33270678 | 33270697 | CACCGTTATACCATCCAGTCTTTGA  | AAACTCAAAGACTGGATGGTATAAC |
| <i>CHMP5</i>   | HGLibA_09496 | 2 | + | 33270645 | 33270664 | CACCGTGCCCAACAGTCATTCAACA  | AAACTGTTGAATGACTGTTGGGCAC |
| <i>CHMP5</i>   | HGLibA_09497 | 3 | - | 33276535 | 33276554 | CACCGAAATCATCTTCATCCAGTTC  | AAACGAACTGGATGAAGATGATTC  |
| <i>CHMP5</i>   | HGLibB_09486 | 4 | + | 33276541 | 33276560 | CACCGGATGAAGATGATTTAGAAGC  | AAACGCTTCAAATCATCTTCATCC  |
| <i>CHMP5</i>   | HGLibB_09487 | 5 | - | 33266030 | 33266049 | CACCGTCGAGAAATCTTCTTGTC    | AAACTTGACAAGAAGATTTCTCGAC |
| <i>CHMP5</i>   | HGLibB_09488 | 6 | + | 33266031 | 33266050 | CACCGTGACAAGAAGATTCTCGAT   | AAACATCGAGAAATCTTCTGTAC   |
| <i>CNTLN</i>   | HGLibA_10397 | 1 | + | 17135153 | 17135172 | CACCGAGTACACGCAATGCGCAGCG  | AAACCGTGCAGATTGCGTGTACTC  |
| <i>CNTLN</i>   | HGLibA_10398 | 2 | + | 17135096 | 17135115 | CACCGTTCGCCCCAGCGCGACAGC   | AAACGCTGTGCGCTGGGGGCGAAC  |
| <i>CNTLN</i>   | HGLibA_10399 | 3 | - | 17143340 | 17143359 | CACCGTGACCACTTGTGTGAGATC   | AAACGATCTCACACAAGTGGTCAGC |
| <i>CNTLN</i>   | HGLibB_10386 | 4 | + | 17143333 | 17143352 | CACCGAAACCCAGATCTCACACAAG  | AAACCTTGTGTGAGATCTGGGTTTC |
| <i>CNTLN</i>   | HGLibB_10387 | 5 | + | 17226237 | 17226256 | CACCGTCTAGAAATCTGCAAGTCA   | AAACTGACTTGCAGAATTTCTAGAC |
| <i>CNTLN</i>   | HGLibB_10388 | 6 | + | 17226264 | 17226283 | CACCGCAAAATACAAGAATTTGAAC  | AAACGTTCAAATCTTGTATTTTGC  |
| <i>DDX58</i>   | HGLibA_12752 | 1 | + | 32526107 | 32526126 | CACCGGGTCTTCCGGATATAATCC   | AAACGGATTATATCCGGAAGACCCC |
| <i>DDX58</i>   | HGLibA_12753 | 2 | + | 32526135 | 32526154 | CACCGTTGCAGGTGCGTGCCTGCT   | AAACAGCAGCGACGACGCTGCAAC  |
| <i>DDX58</i>   | HGLibA_12754 | 3 | - | 32492524 | 32492543 | CACCGTGCTTAGATTTGCTCTACTA  | AAACTAGTAGAGCAAATCTAAGCAC |
| <i>DDX58</i>   | HGLibB_12738 | 4 | - | 32492470 | 32492489 | CACCGATGCCCTTTCAGATCAGACA  | AAACTGCTGATCTGAGAAGGCATC  |
| <i>DDX58</i>   | HGLibB_12739 | 5 | - | 32493782 | 32493801 | CACCGGTCTGAATGTTAATTAATC   | AAACGATTAATTAACATTCAGACC  |
| <i>DDX58</i>   | HGLibB_12740 | 6 | + | 32493897 | 32493916 | CACCGTTTGAAATCCCAACTTTCAA  | AAACTTGAAAGTTGGGATTTCAAAC |
| <i>DENND4C</i> | HGLibB_12937 | 1 | + | 19276383 | 19276402 | CACCGTCCAAGCAAACCTGAACTA   | AAACTAGTTCAGTTTGCTTGGAGC  |
| <i>DENND4C</i> | HGLibB_12938 | 2 | - | 19288604 | 19288623 | CACCGTTATAACACAGAAACACGC   | AAACGCGTGTTCCTGTGTATAAGC  |
| <i>DENND4C</i> | HGLibB_12939 | 3 | - | 19288636 | 19288655 | CACCGTATGCTATTGCATTTGAAGC  | AAACGCTTCAAATGCAATAGCATA  |
| <i>DENND4C</i> | HGLibA_12955 | 4 | + | 19276200 | 19276219 | CACCGACAGACTACTTTGTCGTAGC  | AAACGCTACGACAAAGTAGTCTGTC |
| <i>DENND4C</i> | HGLibA_12956 | 5 | + | 19286810 | 19286829 | CACCGGTGATCCTAGCCACACCCTA  | AAACTAGGGTGTGGCTAGGATCACC |
| <i>DENND4C</i> | HGLibA_12957 | 6 | - | 19286818 | 19286837 | CACCGAGCGACCATAGGGTGTGGCT  | AAACAGCCACACCCTATGGTCGCTC |
| <i>DMRTA1</i>  | HGLibA_13425 | 1 | - | 22447097 | 22447116 | CACCGGAGGTGCGCCGCTAACGCCT  | AAACAGGCGTTAGCGCCGACCTCC  |
| <i>DMRTA1</i>  | HGLibA_13426 | 2 | + | 22451671 | 22451690 | CACCGTACGGCGTAAATCCTAGAGT  | AAACTCTTAGGATTTACGCCGTAC  |
| <i>DMRTA1</i>  | HGLibA_13427 | 3 | - | 22447156 | 22447175 | CACCGTACCGCAACGCCGGGACG    | AAACCGTCCCGCGTTCGCCGTAC   |
| <i>DMRTA1</i>  | HGLibB_13406 | 4 | + | 22451322 | 22451341 | CACCGCAAAGACTTGACTGCGACCA  | AAACTGGTTCGAGTCAAGTCTTTGC |
| <i>DMRTA1</i>  | HGLibB_13407 | 5 | - | 22447456 | 22447475 | CACCGGCCATGACGCGCTGGCGCT   | AAACAGGCCAGCGGTCATGGCCC   |
| <i>DMRTA1</i>  | HGLibB_13408 | 6 | - | 22447690 | 22447709 | CACCGTTGCTGGAAAACCTCGAAAG  | AAACCTTTCGAAGTTTCCAGCAAC  |
| <i>DNAJA1</i>  | HGLibA_13509 | 1 | + | 33036606 | 33036625 | CACCGCAGCTCGTTGAAGCACTGTG  | AAACCACAGTCTTCAACGAGCTGC  |
| <i>DNAJA1</i>  | HGLibA_13510 | 2 | - | 33036679 | 33036698 | CACCGAGTTCACATACCTGGATGAG  | AAACCTCATCCAGGTATGGGAACCT |
| <i>DNAJA1</i>  | HGLibA_13511 | 3 | + | 33030464 | 33030483 | CACCGAGTGCTGCCAATTGCCG     | AAACCGGCAATTGGGACAGCACTCC |

|                |              |   |   |          |          |                            |                             |
|----------------|--------------|---|---|----------|----------|----------------------------|-----------------------------|
| <i>DNAJA1</i>  | HGLibB_13490 | 4 | + | 33030644 | 33030663 | CACCGTTAGAAGTTCATATTGACAA  | AAACTTGTC AATATGA ACTTCTAAC |
| <i>DNAJA1</i>  | HGLibB_13491 | 5 | + | 33026867 | 33026886 | CACCGATATGACAAAGGAGGAGAAC  | AAACGTTCTCCTCCTTTGT CATATC  |
| <i>DNAJA1</i>  | HGLibB_13492 | 6 | - | 33029917 | 33029936 | CACCGCACCATTATATAAGTCTTCT  | AAACAGAAGACTTATATAATGGTGC   |
| <i>ELAVL2</i>  | HGLibA_14881 | 1 | - | 23701393 | 23701412 | CACCGTCCAGGACCGCTAGCTCAGC  | AAACGCTGAGCTAGCGGCTCTGGAC   |
| <i>ELAVL2</i>  | HGLibA_14882 | 2 | - | 23704925 | 23704944 | CACCGTTCCTCGTATTCTTGTCGACC | AAACGGTCGACAAGAATACGAGAAC   |
| <i>ELAVL2</i>  | HGLibA_14883 | 3 | - | 23701560 | 23701579 | CACCGTCGATTGACAAGCGAATTG   | AAACCAATTGCTTGTCAAATCGAC    |
| <i>ELAVL2</i>  | HGLibB_14859 | 4 | - | 23731082 | 23731101 | CACCGTGTGAACTACATTGACCCCA  | AAACTGGGGTCAATGTAGTTCACAC   |
| <i>ELAVL2</i>  | HGLibB_14860 | 5 | - | 23693465 | 23693484 | CACCGGTTGGACAATCTGCTCAATA  | AAACTATTGAGCAGATTGTCCAACC   |
| <i>ELAVL2</i>  | HGLibB_14861 | 6 | + | 23731034 | 23731053 | CACCGTTTGAAGTCTCAATCCATTC  | AAACGAATGGATTGAGACTTCAAAC   |
| <i>EQTN</i>    | HGLibA_15397 | 1 | + | 27296968 | 27296987 | CACCGGCTCTCTCACCTTCAATAGT  | AAACACTATTGAAGGTGAGAGAGCC   |
| <i>EQTN</i>    | HGLibA_15398 | 2 | - | 27296980 | 27296999 | CACCGACTTTGAAGCCTACTATTGA  | AAACTCAATAGTAGGCTTCAAAGTC   |
| <i>EQTN</i>    | HGLibA_15399 | 3 | - | 27296640 | 27296659 | CACCGGCTCCTGCTAATGAGAAAAA  | AAACTTTTCTCATTAGCAGGAGCC    |
| <i>EQTN</i>    | HGLibB_15375 | 4 | + | 27294358 | 27294377 | CACCGATTTCAGACTCAGTGCCATT  | AAACAATGGCACTGAGTCTGAAATC   |
| <i>EQTN</i>    | HGLibB_15376 | 5 | - | 27296695 | 27296714 | CACCGAAATGAAGATGTTAATAAGC  | AAACGCTTATTAACATCTTCATTTC   |
| <i>EQTN</i>    | HGLibB_15377 | 6 | - | 27294376 | 27294395 | CACCGTTCACAACACAAAATCCAAA  | AAACTTTGGATTTTGTGTTGTGAAC   |
| <i>FAM154A</i> | HGLibB_16151 | 1 | + | 18928282 | 18928301 | CACCGCCTCGAGGGCCAGACCAATG  | AAACCATTGGTCTGGCCCTCGAGGC   |
| <i>FAM154A</i> | HGLibB_16152 | 2 | + | 18950748 | 18950767 | CACCGGCCCTCACCTTGATGTAGTC  | AAACGACTACATCAAGGTGAGGGCC   |
| <i>FAM154A</i> | HGLibB_16153 | 3 | + | 18950775 | 18950794 | CACCGCCATTGGTATAGGCCCTTTC  | AAACGAAAGGGCCTATACCAATGGC   |
| <i>FAM154A</i> | HGLibA_16173 | 4 | + | 18941654 | 18941673 | CACCGCACTCCATCTTGTGCTACA   | AAACTGTAGCGACAAGATGGAGTGC   |
| <i>FAM154A</i> | HGLibA_16174 | 5 | - | 18941659 | 18941678 | CACCGATATCCATGTAGCGACAAGA  | AAACTCTTGTGCTACATGGATATC    |
| <i>FAM154A</i> | HGLibA_16175 | 6 | - | 18928904 | 18928923 | CACCGGACCATAAGCTGTAAACCTC  | AAACGAGGTTTACAGCTTATGGTCC   |
| <i>FOCAD</i>   | HGLibA_17776 | 1 | + | 20717846 | 20717865 | CACCGGATTCACCAATCTACAAATC  | AAACGATTGTAGATTGGTGAATCC    |
| <i>FOCAD</i>   | HGLibA_17777 | 2 | + | 20717804 | 20717823 | CACCGTCTTATTGCTGCAGTCCTAA  | AAACTTAGGACTGCAGCAATAAGAC   |
| <i>FOCAD</i>   | HGLibA_17778 | 3 | + | 20740318 | 20740337 | CACCGTTCAGAGTATATATACCATT  | AAACAATGGTATATATACTCTGAAC   |
| <i>FOCAD</i>   | HGLibB_17753 | 4 | - | 20770132 | 20770151 | CACCGACAGCAGCTGAAGACTCATC  | AAACGATGAGTCTCAGCTGCTGTC    |
| <i>FOCAD</i>   | HGLibB_17754 | 5 | - | 20770207 | 20770226 | CACCGGTTCAACACTGTGCTCTAAA  | AAACTTTAGAGCACAGTGTGAACC    |
| <i>FOCAD</i>   | HGLibB_17755 | 6 | + | 20740271 | 20740290 | CACCGACTACAAATGCAAGCTCTTA  | AAACTAAGAGCTTGCATTTGTAGTC   |
| <i>HAUS6</i>   | HGLibB_20860 | 1 | - | 19093270 | 19093289 | CACCGAGTAGCTTTCTCTCAAGTTGT | AAACACA ACTTGAGGAAAGTACTC   |
| <i>HAUS6</i>   | HGLibB_20861 | 2 | - | 19093246 | 19093265 | CACCGTCACTATTCTTTCTCTCTGG  | AAACCCAGGAGAAAGAAATAGTGAC   |
| <i>HAUS6</i>   | HGLibB_20862 | 3 | - | 19089423 | 19089442 | CACCGTTGTGTTACCCAAAAATATC  | AAACGATATTTTTGGGTAACACAAC   |
| <i>HAUS6</i>   | HGLibA_20888 | 4 | + | 19089465 | 19089484 | CACCGAAAATCTGCTACGTGCGAAA  | AAACTTTCGCACGTAGCAGATTTTC   |
| <i>HAUS6</i>   | HGLibA_20889 | 5 | + | 19089497 | 19089516 | CACCGATGCATTTGTGCAAGTCTCTG | AAACCAGGACTTGCACAAATGCATC   |
| <i>HAUS6</i>   | HGLibA_20890 | 6 | - | 19094333 | 19094352 | CACCGTCCGAAAACATTGCTGTGAA  | AAACTTCACAGCAATGTTTTCGGAC   |
| <i>IFNA10</i>  | HGLibA_22658 | 1 | - | 21206910 | 21206929 | CACCGACATGATTTCCGAATCCCCC  | AAACGGGGGATTCGAAAATCATGTC   |
| <i>IFNA10</i>  | HGLibA_22659 | 2 | - | 21206629 | 21206648 | CACCGTCACTCTTATCTAATAGAG   | AAACCTCTATTAGATAAAGAGTGAC   |
| <i>IFNA10</i>  | HGLibA_22660 | 3 | + | 21206955 | 21206974 | CACCGAGATTCTTCCCATTGTGCC   | AAACGGGACAAAATGGGAAGAATCTC  |
| <i>IFNA10</i>  | HGLibB_22627 | 4 | + | 21206919 | 21206938 | CACCGGGAAATCATGTCTGTCTTTC  | AAACGAAGGACAGACATGATTTCCC   |
| <i>IFNA10</i>  | HGLibB_22628 | 5 | + | 21207069 | 21207088 | CACCGCCATAAGTAAAGAAAAGGAC  | AAACGTCCTTTCTTACTTATGGC     |
| <i>IFNA14</i>  | HGLibA_22664 | 1 | + | 21239820 | 21239839 | CACCGTCAAAGTCTCTGTTATTTC   | AAACGAATAACAGGAGGACTTTGAC   |
| <i>IFNA14</i>  | HGLibA_22665 | 2 | - | 21239833 | 21239852 | CACCGAAACCCACAGCCTGAATAAC  | AAACGTTATTAGGCTGTGGGTTTC    |
| <i>IFNA14</i>  | HGLibA_22666 | 3 | + | 21239727 | 21239746 | CACCGGGTTGCCATCAAATCTCTCC  | AAACGGAGGAATTTGATGGCAACCC   |

|               |              |   |          |          |          |                            |                            |
|---------------|--------------|---|----------|----------|----------|----------------------------|----------------------------|
| <i>IFNA14</i> | HGLibB_22633 | 4 | multiple | 21239551 | 21239570 | CACCGCCCAACCTCCTGTATCACAC  | AAACGTGTGATACAGGAGTTGGGC   |
| <i>IFNA14</i> | HGLibB_22634 | 5 | -        | 21239580 | 21239599 | CACCGTTTCCAGCAAATGAATGACC  | AAACGGTCATTCATTTGCTGGAAC   |
| <i>IFNA14</i> | HGLibB_22635 | 6 | +        | 21239574 | 21239593 | CACCGCTTCCAGGTCAATTCATTTGC | AAACGCAAATGAATGACCTGGAAGC  |
| <i>IFNA16</i> | HGLibA_22667 | 1 | +        | 21216921 | 21216940 | CACCGCCCAACCTCCTGTGTACACAC | AAACGTGTGACACAGGAGTTGGGC   |
| <i>IFNA16</i> | HGLibA_22668 | 2 | multiple | 21217047 | 21217066 | CACCGCTGCTGGATCATCTCATGGA  | AAACTCCATGAGATGATCCAGCAGC  |
| <i>IFNA16</i> | HGLibA_22669 | 3 | -        | 21217118 | 21217137 | CACCGATATGATTTCCGGATCCCCC  | AAACGGGGGAATCCGAAATCATATC  |
| <i>IFNA16</i> | HGLibB_22636 | 4 | -        | 21216932 | 21216951 | CACCGCCTAGAAGCCTGTGTGACAC  | AAACGTGTGACACAGGCTTCTAGGC  |
| <i>IFNA16</i> | HGLibB_22637 | 5 | +        | 21216971 | 21216990 | CACCGTTCAATGTAGAATTTGTCT   | AAACAGACAAATTCTACATTGAACC  |
| <i>IFNA16</i> | HGLibB_22638 | 6 | +        | 21217097 | 21217116 | CACCGGGTTGCCATCAAAACCTCC   | AAACGGAGGTGTTTGTATGCAACCC  |
| <i>IFNA17</i> | HGLibA_22670 | 1 | -        | 21227986 | 21228005 | CACCGACATGACTTTGGACTTCCCC  | AAACGGGGGAAGTCCAAAGTCATGTC |
| <i>IFNA17</i> | HGLibA_22671 | 2 | -        | 21227818 | 21227837 | CACCGTTACCAGCAACTGAATAACC  | AAACGGTTATTTCAGTTGCTGTTAAC |
| <i>IFNA17</i> | HGLibA_22672 | 3 | -        | 21227618 | 21227637 | CACCGCAAACCTTGCAAAAAATATTA | AAACTAATATTTTTTGTCAAGTTTGC |
| <i>IFNA2</i>  | HGLibA_22673 | 1 | -        | 21385307 | 21385326 | CACCGGGCCTTGACCTTTGCTTTAC  | AAACGTAAAGCAAAGGTCAAGGCC   |
| <i>IFNA2</i>  | HGLibA_22674 | 2 | -        | 21385115 | 21385134 | CACCGGTTTGGCAACCAGTTCCAAA  | AAACTTTGGAAGTGGTTGCCAAACC  |
| <i>IFNA2</i>  | HGLibA_22675 | 3 | +        | 21385121 | 21385140 | CACCGACTGGTTGCCAAACTCCTCC  | AAACGGAGGAGTTTGGCAACCAGTC  |
| <i>IFNA2</i>  | HGLibB_22642 | 4 | +        | 21385302 | 21385321 | CACCGCACCAGTAAAGCAAAGGTCA  | AAACTGACCTTTGCTTTACTGGTGC  |
| <i>IFNA2</i>  | HGLibB_22643 | 5 | +        | 21385214 | 21385233 | CACCGTCAAGGTCTCTGCTACCC    | AAACGGGTAGCAGGAGGACCTTGAC  |
| <i>IFNA2</i>  | HGLibB_22644 | 6 | -        | 21384926 | 21384945 | CACCGGACAGAGACTCCCTGATGA   | AAACTCATCAGGGGAGTCTCTGTCC  |
| <i>IFNA21</i> | HGLibA_22676 | 1 | +        | 21166228 | 21166247 | CACCGCCCAACCTCCTGTATCACGC  | AAACGCGTGATACAGGAGTTGGGC   |
| <i>IFNA21</i> | HGLibA_22677 | 2 | -        | 21166425 | 21166444 | CACCGACATGACTTTGGATTCCCCC  | AAACGGGGGAATCCAAAGTCATGTC  |
| <i>IFNA21</i> | HGLibA_22678 | 3 | -        | 21166232 | 21166251 | CACCGCCTGCGTGATACAGGAGGT   | AAACACCTCCTGTATCACGCAGGCC  |
| <i>IFNA21</i> | HGLibB_22645 | 4 | -        | 21166257 | 21166276 | CACCGTAAACCAGCAGTGAATGACC  | AAACGGTCATTCAGCTGCTGGTTAC  |
| <i>IFNA4</i>  | HGLibA_22679 | 1 | -        | 21187344 | 21187363 | CACCGACATGATTTCCGGATTCCCCG | AAACGGGGGAATCCGAAATCATGTC  |
| <i>IFNA4</i>  | HGLibA_22680 | 2 | +        | 21187353 | 21187372 | CACCGGAAATCATGTCTGTCTTTC   | AAACGAAGGACAGACATGATTCGC   |
| <i>IFNA4</i>  | HGLibB_22648 | 4 | multiple | 21187314 | 21187333 | CACCGTGATGGCCACCAGTCCAGA   | AAACTCTGGAAGTGGTGGCCATCAC  |
| <i>IFNA5</i>  | HGLibA_22682 | 1 | +        | 21304872 | 21304891 | CACCGTCCAACCTCCTGCATCATA   | AAACGTATGATGCAGGAGTTGGAC   |
| <i>IFNA5</i>  | HGLibA_22683 | 2 | -        | 21305192 | 21305211 | CACCGTGCAAGTCAATCTGTCTC    | AAACGAGAACAGATTGACTTGCAGC  |
| <i>IFNA5</i>  | HGLibA_22684 | 3 | -        | 21305154 | 21305173 | CACCGAGACCCACAGCCTGAGTAAC  | AAACGTTACTCAGGCTGTGGGTCTC  |
| <i>IFNA5</i>  | HGLibB_22651 | 4 | -        | 21305126 | 21305145 | CACCGTTTGATGATAATGGCACAAA  | AAACTTTGTGCCATTATCATCAAAC  |
| <i>IFNA5</i>  | HGLibB_22652 | 5 | multiple | 21304781 | 21304800 | CACCGATTCTTCTCTGTGATAG     | AAACCTATCTGACAGAGAAGAAATC  |
| <i>IFNA5</i>  | HGLibB_22653 | 6 | +        | 21305141 | 21305160 | CACCGTCAAAGTCTCTGTACTC     | AAACGAGTAACAGGAGGACTTTGAC  |
| <i>IFNA6</i>  | HGLibA_22685 | 1 | +        | 21350772 | 21350791 | CACCGTCATGGTCTCTGTGACCC    | AAACGGGTACAGGAGGACCATGAC   |
| <i>IFNA6</i>  | HGLibA_22686 | 2 | -        | 21350581 | 21350600 | CACCGCATCTGTGTGTTGGATGAG   | AAACCTCATCCCAAGCAACAGATGC  |
| <i>IFNA6</i>  | HGLibA_22687 | 3 | -        | 21350700 | 21350719 | CACCGACATGACTTCAGATTCCCC   | AAACGGGGAAATCTGAAGTCATGTC  |
| <i>IFNA6</i>  | HGLibB_22654 | 4 | +        | 21350625 | 21350644 | CACCGAGGTCTGTGAATCACCTCA   | AAACTGAGGTGATTACAGCAGACCTC |
| <i>IFNA6</i>  | HGLibB_22655 | 5 | -        | 21350338 | 21350357 | CACCGCATCAAGAAACTGCAAGAA   | AAACTTCTTGAAGTTTCTGTATGC   |
| <i>IFNA6</i>  | HGLibB_22656 | 6 | multiple | 21350643 | 21350662 | CACCGAGCCATCTCTGTCTCCATG   | AAACCATGGAGGACAGAGATGGCTC  |
| <i>IFNA7</i>  | HGLibA_22688 | 1 | -        | 21202063 | 21202082 | CACCGAGACCCACAGCCTGCGTAAT  | AAACATTACGCAGGCTGTGGGTCTC  |
| <i>IFNA7</i>  | HGLibA_22689 | 2 | -        | 21201978 | 21201997 | CACCGACATGAATTCAGATTCCCAG  | AAACCTGGGAATCTGAATTCATGTC  |
| <i>IFNA7</i>  | HGLibA_22690 | 3 | +        | 21202050 | 21202069 | CACCGTCAAGGCCCTCTATTACGC   | AAACGCGTAATAGGAGGGCCTTGAC  |
| <i>IFNA7</i>  | HGLibB_22657 | 4 | -        | 21202101 | 21202120 | CACCGTACAAATCCATCTGCTCTC   | AAACGAGAGCAGATGGATTTGTAGC  |

|               |              |   |   |          |          |                            |                            |
|---------------|--------------|---|---|----------|----------|----------------------------|----------------------------|
| <i>IFNA7</i>  | HGLibB_22658 | 5 | + | 21201991 | 21202010 | CACCGTTCATGTCTGTCTTCAAGC   | AAACGCTTGAAGGACAGACATGAAC  |
| <i>IFNA7</i>  | HGLibB_22659 | 6 | + | 21202090 | 21202109 | CACCGATCACAGCCCAGAGAGCAGA  | AAACTCTGCTCTCTGGGCTGTGATC  |
| <i>IFNA8</i>  | HGLibA_22691 | 1 | + | 21409565 | 21409584 | CACCGAGAGTCTCCCCGTATGTACG  | AAACCGTACATCAGGGGAGACTCTC  |
| <i>IFNA8</i>  | HGLibA_22692 | 2 | - | 21409487 | 21409506 | CACCGCGATGTAGAATTCATCTAGA  | AAACTCTAGATGAATTCTACATCGC  |
| <i>IFNA8</i>  | HGLibA_22693 | 3 | - | 21409208 | 21409227 | CACCGACTTGTAGCTGAGCACCCT   | AAACAGTGGTGTCTCAGTACAAGTC  |
| <i>IFNA8</i>  | HGLibB_22660 | 4 | - | 21409364 | 21409383 | CACCGGTTTATCATCAAACCTCTCC  | AAACGGAGGAGTTTGTATGATAAACC |
| <i>IFNA8</i>  | HGLibB_22661 | 5 | + | 21409373 | 21409392 | CACCGTGATGATAAACAGTTCCAGA  | AAACTCTGGAAGTGTATATCATCAC  |
| <i>IFNA8</i>  | HGLibB_22662 | 6 | + | 21409535 | 21409554 | CACCGTCTGTGTGTATGCAGGAAG   | AAACCTTCTGCATCACACAGGACC   |
| <i>IFNB1</i>  | HGLibA_22700 | 1 | + | 21077295 | 21077314 | CACCGTAGGAGATCTTCAGTTTCGG  | AAACCCGAAACTGAAGATCTCTAC   |
| <i>IFNB1</i>  | HGLibA_22701 | 2 | - | 21077789 | 21077808 | CACCGTCCATGAGCTACAACCTGCT  | AAACAGCAAGTTGTAGCTCATGGAC  |
| <i>IFNB1</i>  | HGLibA_22702 | 3 | + | 21077724 | 21077743 | CACCGCCTCCCATCAATTGCCAC    | AAACGTGGCAATTGAATGGGAGGCC  |
| <i>IFNB1</i>  | HGLibB_22669 | 4 | - | 21077544 | 21077563 | CACCGACTATTGTTGAGAACCTCC   | AAACGGAGGTTCTCAACAATAGTCC  |
| <i>IFNB1</i>  | HGLibB_22670 | 5 | + | 21077359 | 21077378 | CACCGTCCACTCTGACTATGGTCC   | AAACGGACCATAGTCAGAGTGAAC   |
| <i>IFNB1</i>  | HGLibB_22671 | 6 | + | 21077523 | 21077542 | CACCGTCTGATGATAGACATTAGCC  | AAACGGCTAATGTCTATCATCAGAC  |
| <i>IFNE</i>   | HGLibA_22703 | 1 | - | 21481073 | 21481092 | CACCGCTACAGAGTTTAGAAGCCCG  | AAACCGGGCTTCTAAACTCTGTAGC  |
| <i>IFNE</i>   | HGLibA_22704 | 2 | + | 21481097 | 21481116 | CACCGCTCTGTCTCATGTCTGTTCA  | AAACTGAACGACATGAAGCAAGAGC  |
| <i>IFNE</i>   | HGLibA_22705 | 3 | + | 21481315 | 21481334 | CACCGCCAGTCCCATGAGTGCTTCT  | AAACAGAAGCACTCATGGGACTGGC  |
| <i>IFNE</i>   | HGLibB_22672 | 4 | + | 21481181 | 21481200 | CACCGTCTACTTGGACAATGGCCC   | AAACGGGCCATTGTCCAAGTAGAAC  |
| <i>IFNE</i>   | HGLibB_22673 | 5 | - | 21481324 | 21481343 | CACCGAGAATACCTAGAAAGCACTCA | AAACTGAGTGCTTCTAGGTATTCTC  |
| <i>IFNE</i>   | HGLibB_22674 | 6 | - | 21481247 | 21481266 | CACCGAAGTAAAATGTACTTCCGA   | AAACTCGGAAGTACATTTTAACTTC  |
| <i>IFNK</i>   | HGLibA_22715 | 1 | - | 27524418 | 27524437 | CACCGGTTTCAGTAAGTTACAGTCC  | AAACGGACTGTAACCTACTGAACGC  |
| <i>IFNK</i>   | HGLibA_22716 | 2 | - | 27524679 | 27524698 | CACCGCTTGCTGATCAAGTCCTATT  | AAACAATAGGACTTGATCAGCAAGC  |
| <i>IFNK</i>   | HGLibA_22717 | 3 | + | 27524383 | 27524402 | CACCGTTATGGGTATATTCATTGC   | AAACGCAATGAATATACCCATAAGC  |
| <i>IFNK</i>   | HGLibB_22684 | 4 | + | 27524438 | 27524457 | CACCGTTCACCTGAGAAGAGTCACC  | AAACGGTGACTCTTCTCAGGTGAAC  |
| <i>IFNK</i>   | HGLibB_22685 | 5 | - | 27524385 | 27524404 | CACCGCAGCAATGAATATACCCATA  | AAACTATGGGTATATTCATTGTCTC  |
| <i>IFNK</i>   | HGLibB_22686 | 6 | + | 27524700 | 27524719 | CACCGAGAGTACCTGAACCAATGCT  | AAACAGCATTGGTTCAGGTACTCTC  |
| <i>IFNW1</i>  | HGLibA_22733 | 1 | + | 21141519 | 21141538 | CACCGGCTATAGCTGGTCATCTACTA | AAACTAGTGATGACCAGCTATAGCC  |
| <i>IFNW1</i>  | HGLibA_22734 | 2 | - | 21141514 | 21141533 | CACCGATGACCAGCTATAGCCCTGT  | AAACACAGGGCTATAGCTGGTCATC  |
| <i>IFNW1</i>  | HGLibA_22735 | 3 | + | 21141438 | 21141457 | CACCGCATTGGTGCAGAAGCACCA   | AAACTGGTGTCTTGCACCAAATGC   |
| <i>IFNW1</i>  | HGLibB_22702 | 4 | - | 21141191 | 21141210 | CACCGGACCTGCTGTGTCAGGTAG   | AAACCTACCTGCAGCAAGCAGGTCC  |
| <i>IFNW1</i>  | HGLibB_22703 | 5 | + | 21141186 | 21141205 | CACCGTCCACTACCTGCAGCAAGC   | AAACGCTTGTGCAGGTAGTGGGAC   |
| <i>IFNW1</i>  | HGLibB_22704 | 6 | - | 21141141 | 21141160 | CACCGGCAGCCCTGCCTGACCTTG   | AAACCAAGGTCAGTGCAGGGCTGCC  |
| <i>IFT74</i>  | HGLibA_22769 | 1 | + | 26961990 | 26962009 | CACCGGCAGCTCGCCCTGTTTCAAG  | AAACCTTGAAACAGGGCGAGCTGCC  |
| <i>IFT74</i>  | HGLibA_22770 | 2 | + | 26962055 | 26962074 | CACCGCCTATCAGGAAATATTCGAG  | AAACCTCGAATATTTCTGATAGGC   |
| <i>IFT74</i>  | HGLibA_22771 | 3 | + | 26980586 | 26980605 | CACCGTTAGACAAATCTTACTATCT  | AAACAGATAGTAAGATTTGTCTAAC  |
| <i>IFT74</i>  | HGLibB_22738 | 4 | - | 26980576 | 26980595 | CACCGATTGTCTAAAATTTGCCTC   | AAACGAGGCAAAATTTAGACAAATC  |
| <i>IFT74</i>  | HGLibB_22739 | 5 | + | 26984279 | 26984298 | CACCGTGAAGTTAATAAACTTCAGA  | AAACTCTGAAGTTTATTAACCTCAC  |
| <i>IFT74</i>  | HGLibB_22740 | 6 | + | 26984332 | 26984351 | CACCGTATATTGTATATGAAAAG    | AAACCTTTTCATATGACAAATATAC  |
| <i>IZUMO3</i> | HGLibA_23897 | 1 | - | 24545665 | 24545684 | CACCGGACAACCTGCTGTCGGGGAG  | AAACCTCCCCGACAGCAGGTTGTCC  |
| <i>IZUMO3</i> | HGLibA_23898 | 2 | - | 24545482 | 24545501 | CACCGGCTGCTTGAACGCAGATTA   | AAACTAATCTGCCGTTCAAGCAGCC  |
| <i>IZUMO3</i> | HGLibA_23899 | 3 | - | 24545276 | 24545295 | CACCGTCCCTCTCTAGCTGTTACGC  | AAACGCTGAACAGCTAGAGAGGGAC  |

|               |              |   |   |          |          |                            |                            |
|---------------|--------------|---|---|----------|----------|----------------------------|----------------------------|
| <i>IZUMO3</i> | HGLibB_23863 | 4 | - | 24545015 | 24545034 | CACCGTCTCGATGTCTGCCAAAACC  | AAACGGTTTTGGCAGACATCGAGAC  |
| <i>IZUMO3</i> | HGLibB_23864 | 5 | - | 24545044 | 24545063 | CACCGTTAGGTGTCTTTATCTATCA  | AAACTGATAGATAAAGACACCTAAC  |
| <i>IZUMO3</i> | HGLibB_23865 | 6 | + | 24545488 | 24545507 | CACCGGCCGTTCAAGCAGCTGAGTT  | AAACAACCTCAGCTGCTTGACGGCC  |
| <i>KLHL9</i>  | HGLibA_25227 | 1 | + | 21334825 | 21334844 | CACCGCGCCCATTTCCGCGTTACCA  | AAACTGGTAACGGCGAAATGGGCGC  |
| <i>KLHL9</i>  | HGLibA_25228 | 2 | - | 21333840 | 21333859 | CACCGGATGCTCCCCGTTACCAGCA  | AAACTGCTGGTAACGGGGAGCATCC  |
| <i>KLHL9</i>  | HGLibA_25229 | 3 | + | 21334181 | 21334200 | CACCGTCCAACCTTAGCCAGCGAC   | AAACGTCGCTGGCTAAGGTTGGAAC  |
| <i>KLHL9</i>  | HGLibB_25192 | 4 | + | 21333717 | 21333736 | CACCGTGCATCCATTTATTATACCG  | AAACCGGTATAATAAATGGATGCAC  |
| <i>KLHL9</i>  | HGLibB_25193 | 5 | - | 21334354 | 21334373 | CACCGCACCTACAATCTTATAGAAG  | AAACCTTCTATAAGATTGTAGGTGC  |
| <i>KLHL9</i>  | HGLibB_25194 | 6 | - | 21334186 | 21334205 | CACCGAGCTGTGCTGGCTAAGGT    | AAACACCTTAGCCAGCGACAGGCTC  |
| <i>LINGO2</i> | HGLibA_26587 | 1 | - | 27950512 | 27950531 | CACCGCGATTGATCGCCATCCCAGA  | AAACTCTGGGATGGCGATCAATCGC  |
| <i>LINGO2</i> | HGLibA_26588 | 2 | + | 27949320 | 27949339 | CACCGACGCCCTCGGGGTGTCACCC  | AAACGGGTGACACCCGAAGGGCTC   |
| <i>LINGO2</i> | HGLibA_26589 | 3 | - | 27950306 | 27950325 | CACCGTCGTCTAAAGCTGGTCCCTT  | AAACAAGGGACCAGCTTTAGACGAC  |
| <i>LINGO2</i> | HGLibB_26550 | 4 | - | 27949250 | 27949269 | CACCGCTTGAAATCCGCTTTGCC    | AAACGGGCAAAGCGGATTTCCAAGC  |
| <i>LINGO2</i> | HGLibB_26551 | 5 | + | 27950287 | 27950306 | CACCGAGCCCCGTAATACTCCCAA   | AAACTTGGGAGTATTACGGGGCTC   |
| <i>LINGO2</i> | HGLibB_26552 | 6 | + | 27949913 | 27949932 | CACCGATGTGAGGTTGAGACCGTAG  | AAACCTACGGTCTCAACCTCACATC  |
| <i>LRRC19</i> | HGLibA_27274 | 1 | - | 26995710 | 26995729 | CACCGTAGTTATAATCATCATCGCC  | AAACGGCGATGATGATTATAACTAC  |
| <i>LRRC19</i> | HGLibA_27275 | 2 | - | 26998043 | 26998062 | CACCGATCTTACATAATAACGGTTT  | AAACAAACCCTTATTATGTAAAGATC |
| <i>LRRC19</i> | HGLibA_27276 | 3 | - | 26997981 | 26998000 | CACCGCTCCATCTATGTAATTCAAC  | AAACGTTGAATTACATAGATGGAGC  |
| <i>LRRC19</i> | HGLibB_27234 | 4 | + | 26995666 | 26995685 | CACCGTCCAGTAAACCATCTTCAT   | AAACATGAAGATGGTTTTACTGGAC  |
| <i>LRRC19</i> | HGLibB_27235 | 5 | + | 26996410 | 26996429 | CACCGGAGTGGCATTCAGCCTTATG  | AAACCATAAGGCTGAATGCCACTCC  |
| <i>LRRC19</i> | HGLibB_27236 | 6 | - | 26996426 | 26996445 | CACCGTATCAAAACAGTACCTCATA  | AAACTATGAGGTAAGTGTGATAC    |
| <i>MLL3</i>   | HGLibA_29416 | 1 | + | 20448204 | 20448223 | CACCGGTGGATGGCCTCAAGATGC   | AAACGCATCTGAAGGCCATCCACC   |
| <i>MLL3</i>   | HGLibA_29417 | 2 | + | 20448236 | 20448255 | CACCGTAATCAAAGCGGACTTTCTT  | AAACAGGAAAGTCCGCTTTGATTAC  |
| <i>MLL3</i>   | HGLibA_29418 | 3 | - | 20622246 | 20622265 | CACCGGCCCCAGGCATGGCTAGCT   | AAACAGCTAGCCATGCCTGGGGCC   |
| <i>MLL3</i>   | HGLibB_29375 | 4 | - | 20456751 | 20456770 | CACCGCCTTACAAAGTAGAAGAATC  | AAACGATTCTTCTACTTTGTAAGGC  |
| <i>MLL3</i>   | HGLibB_29376 | 5 | + | 20456748 | 20456767 | CACCGCCAGATTTCTTACTTTGTA   | AAACTACAAAGTAGAAGAATCTGGC  |
| <i>MLL3</i>   | HGLibB_29377 | 6 | - | 20448215 | 20448234 | CACCGACTTATTCCTGCATCTTGA   | AAACTCAAGATGCAGGAATAAGTCC  |
| <i>MOB3B</i>  | HGLibA_29596 | 1 | - | 27359140 | 27359159 | CACCGTCTATATCCACCACCTTCGAC | AAACGTCGAAGTGGTGGATATAGAC  |
| <i>MOB3B</i>  | HGLibA_29597 | 2 | - | 27359049 | 27359068 | CACCGGATGAACCTCATAGACCGCA  | AAACTGCGGTCTATGAGGTTATCC   |
| <i>MOB3B</i>  | HGLibA_29598 | 3 | + | 27455121 | 27455140 | CACCGATGAACCTTACCACGCATGT  | AAACACATGCGTGGGTAAGTTCATC  |
| <i>MOB3B</i>  | HGLibB_29555 | 4 | + | 27455246 | 27455265 | CACCGCTGCCACCGATACTCATATT  | AAACAATATGAGTATCGGTGGCAGC  |
| <i>MOB3B</i>  | HGLibB_29556 | 5 | - | 27330600 | 27330619 | CACCGTCCAGAAAGAAATGACGAGC  | AAACGCTCGTCAATTTCTTCTGGAC  |
| <i>MOB3B</i>  | HGLibB_29557 | 6 | - | 27455495 | 27455514 | CACCGACAAGACCTTCCGACCCAAG  | AAACCTTGGGTCCGAAGGCTTGTGTC |
| <i>MTAP</i>   | HGLibA_30318 | 1 | - | 21837999 | 21838018 | CACCGACTACACACCTCTCTCGTTT  | AAACAAACGAGAGAGGTGTGTAGTC  |
| <i>MTAP</i>   | HGLibA_30319 | 2 | + | 21818069 | 21818088 | CACCGTCAACTACCAGCGAACATC   | AAACGATGTTCCGCTGGTAGTTGAC  |
| <i>MTAP</i>   | HGLibA_30320 | 3 | - | 21816763 | 21816782 | CACCGAAATACCATACTTGCAAGG   | AAACCCTTGAAGGTATGGTATTTTC  |
| <i>MTAP</i>   | HGLibB_30277 | 4 | + | 21818046 | 21818065 | CACCGGCACACCATCATGCCTTCAA  | AAACTTGAAGGCATGATGGTGTGCC  |
| <i>MTAP</i>   | HGLibB_30278 | 5 | - | 21837970 | 21837989 | CACCGACGGCTCAGCCATTGGAATA  | AAACTATTCCAATGGCTGAGCCGTC  |
| <i>MTAP</i>   | HGLibB_30279 | 6 | - | 21815510 | 21815529 | CACCGTGGATATTAACCTTGCCAAA  | AAACTTTGGCAAGGTTAATATCCAC  |
| <i>NDUFB6</i> | HGLibA_31523 | 1 | - | 32573043 | 32573062 | CACCGCGACATGACGGGTACTCTC   | AAACGAGGTACCCCGTCATGTCGC   |
| <i>NDUFB6</i> | HGLibA_31524 | 2 | - | 32570994 | 32571013 | CACCGTCTCATGTACTTGTACCTGTC | AAACGACAGGTACAAGTACATGAGC  |

|                |              |   |   |          |          |                            |                           |
|----------------|--------------|---|---|----------|----------|----------------------------|---------------------------|
| <i>NDUFB6</i>  | HGLibA_31525 | 3 | + | 32573021 | 32573040 | CACCGTGCAGCCGAGTTTCTCATC   | AAACGATGAGAACTGCGGCTGCAC  |
| <i>NDUFB6</i>  | HGLibB_31481 | 4 | - | 32553930 | 32553949 | CACCGTTCCTAGGGTGATACAATTC  | AAACGAATTGTATCACCTTAGGAAC |
| <i>NDUFB6</i>  | HGLibB_31482 | 5 | + | 32558899 | 32558918 | CACCGAAGACTTACAGGGAATATTC  | AAACGAATATCCCTGTAAAGTCTTC |
| <i>NDUFB6</i>  | HGLibB_31483 | 6 | - | 32558942 | 32558961 | CACCGTTATTACAGGAAAAACCATA  | AAACTATGGTTTTTCTGTAAATAAC |
| <i>NFX1</i>    | HGLibA_31847 | 1 | + | 33301310 | 33301329 | CACCGCTGTGAATTGGTTCGTGTCA  | AAACTGACACGAACCAATTCACAGC |
| <i>NFX1</i>    | HGLibA_31848 | 2 | - | 33301407 | 33301426 | CACCGAATTGACCTGCTTGAGATGC  | AAACGCATCTCAAGCAGGTCAATTC |
| <i>NFX1</i>    | HGLibA_31849 | 3 | + | 33307192 | 33307211 | CACCGGCAAGGTAAGAATCCTGAG   | AAACCTCAGGATTCTTTACCTTGCC |
| <i>NFX1</i>    | HGLibB_31804 | 4 | + | 33307221 | 33307240 | CACCGAATGAAATTCACATAGCTG   | AAACCAGCTATGTGGAATTCATTC  |
| <i>NFX1</i>    | HGLibB_31805 | 5 | + | 33311144 | 33311163 | CACCGATGACAAAAACATGTGAATG  | AAACCATTACATGTTTTTGTGCATC |
| <i>NFX1</i>    | HGLibB_31806 | 6 | + | 33311096 | 33311115 | CACCGTCTTTCAGTCTCTGCCATCC  | AAACGGATGGCAGAGACTGAAAGAC |
| <i>NOL6</i>    | HGLibA_32270 | 1 | + | 33472336 | 33472355 | CACCGTTCAGCCAATGTACGCTTCC  | AAACGGAAGCGTACATTGGCTGAAC |
| <i>NOL6</i>    | HGLibA_32271 | 2 | + | 33472253 | 33472272 | CACCGCGATTAAGCTCCTCATTTGGT | AAACACCAATGAGGAGCTTAATCGC |
| <i>NOL6</i>    | HGLibA_32272 | 3 | + | 33472019 | 33472038 | CACCGAGGGCACCCCTACAACCCGC  | AAACGCGGGTTGTGAGGGTGCCCTC |
| <i>NOL6</i>    | HGLibB_32227 | 4 | - | 33469085 | 33469104 | CACCGCTACCCCCGCTATAACACA   | AAACTGTGTTATAGCGGGGGTAGC  |
| <i>NOL6</i>    | HGLibB_32228 | 5 | + | 33469057 | 33469076 | CACCGACTCGAGAAGTGTATCTTGC  | AAACGCAAGATACAGTTCTCGAGTC |
| <i>NOL6</i>    | HGLibB_32229 | 6 | - | 33472029 | 33472048 | CACCGAGGTCAACCAGCGGGTTGTG  | AAACCACAACCCGCTGGTTGACCTC |
| <i>PLAA</i>    | HGLibA_36929 | 1 | + | 26928160 | 26928179 | CACCGGTCAACATTAAGCCCTGTTC  | AAACGAACAGGGCTTAATGTTGACC |
| <i>PLAA</i>    | HGLibA_36930 | 2 | - | 26928176 | 26928195 | CACCGGGTAAAGATCTTACCTGAAC  | AAACGTTCAGGTAAGATCTTTACCC |
| <i>PLAA</i>    | HGLibA_36931 | 3 | - | 26928339 | 26928358 | CACCGGGGACACCACTGCTAAAGTC  | AAACGACTTTAGCAGTGGTGTCCCC |
| <i>PLAA</i>    | HGLibB_36882 | 4 | - | 26928308 | 26928327 | CACCGCAAGTGCATGATGACCTTGC  | AAACGCAAGGTCATCATGCACTTGC |
| <i>PLAA</i>    | HGLibB_36883 | 5 | - | 26926441 | 26926460 | CACCGGAGTGTCTTGAAGTATATTA  | AAACTAATATACTTCAAGACACTCC |
| <i>PLAA</i>    | HGLibB_36884 | 6 | + | 26926482 | 26926501 | CACCGAATACTAGCATCATTTGCAC  | AAACGTGCAATGATGCTAGTATTC  |
| <i>PLIN2</i>   | HGLibB_37124 | 1 | - | 19126229 | 19126248 | CACCGCTCAGCCTATCTCAGTACAA  | AAACTTGTACTGAGATAGGCTGAGC |
| <i>PLIN2</i>   | HGLibB_37125 | 2 | + | 19121128 | 19121147 | CACCGTGCCCCAGTCACAGCGCCTT  | AAACAAGGCGCTGTGACTGGGGCAC |
| <i>PLIN2</i>   | HGLibB_37126 | 3 | + | 19123552 | 19123571 | CACCGCCAAAGCTCACCTGAGTTGA  | AAACTCAACTCAGGTGAGCTTGGGC |
| <i>PLIN2</i>   | HGLibA_37172 | 4 | + | 19121059 | 19121078 | CACCGCATACCCCTGTGATCGTGC   | AAACGCACGATCACAGGGGTGATGC |
| <i>PLIN2</i>   | HGLibA_37173 | 5 | - | 19119725 | 19119744 | CACCGTCACTCCCGTGCCTACCAGC  | AAACGCTGGTAGGCACGGGAGTGAC |
| <i>PLIN2</i>   | HGLibA_37174 | 6 | - | 19119650 | 19119669 | CACCGGCTCCATTTCTACTGTTACC  | AAACGGTGAACAGTAGAATGGAGCC |
| <i>PRSS3</i>   | HGLibA_38922 | 1 | + | 33750672 | 33750691 | CACCGGACGCACTTGGCGAGCGGCG  | AAACCGCCGCTCGCCAAGTGCCTCC |
| <i>PRSS3</i>   | HGLibA_38923 | 2 | - | 33797979 | 33797998 | CACCGGGACACGCGGGCATTGATGA  | AAACTCATCAATGCCCGGTGTCCC  |
| <i>PRSS3</i>   | HGLibA_38924 | 3 | - | 33750662 | 33750681 | CACCGCAAGTGCCTCCACCCAGAAG  | AAACCTTCTGGGTGGACGCACTTGC |
| <i>PRSS3</i>   | HGLibB_38873 | 4 | - | 33750841 | 33750860 | CACCGTCCGCGTACCCTCCCCCGC   | AAACGCGGGGGAGGGTACGCGGACC |
| <i>PRSS3</i>   | HGLibB_38874 | 5 | - | 33797918 | 33797937 | CACCGAGAGTGTCCCTGTGTATTT   | AAACAAATACAACAGGGACACTCTC |
| <i>PRSS3</i>   | HGLibB_38875 | 6 | + | 33794790 | 33794809 | CACCGATGCACATGAGAGAGACAAG  | AAACCTTGCTCTCTCATGTGCATC  |
| <i>PTPLAD2</i> | HGLibA_39420 | 1 | + | 21015967 | 21015986 | CACCGGACTGGTGATCACCACAAA   | AAACTTTTGTGGTGATCACCAGTCC |
| <i>PTPLAD2</i> | HGLibA_39421 | 2 | + | 21011637 | 21011656 | CACCGGAGCCATGTCAAGACAGCAT  | AAACATGCTGTCTTGACATGGCTCC |
| <i>PTPLAD2</i> | HGLibA_39422 | 3 | - | 21011643 | 21011662 | CACCGTATCCTATGCTGTCTTGACA  | AAACTGTCAAGACAGCATAGGATAC |
| <i>PTPLAD2</i> | HGLibB_39371 | 4 | - | 21029350 | 21029369 | CACCGTATTACTTAATCCAGTTCTG  | AAACCAGAACTGGATTAAGTAATAC |
| <i>PTPLAD2</i> | HGLibB_39372 | 5 | + | 21015934 | 21015953 | CACCGCACACACCACATATTTCTCT  | AAACAGAGAAATATGTGGTGTGTGC |
| <i>PTPLAD2</i> | HGLibB_39373 | 6 | + | 21029324 | 21029343 | CACCGTATTTGTAAATATCCAAGAG  | AAACCTCTTGATATTTACAAATAC  |
| <i>RPS6</i>    | HGLibA_42154 | 1 | - | 19378465 | 19378484 | CACCGTACTACAGTGCCTCGCCGCC  | AAACGCGCGCGAGGCACTGTAGTAC |

|                |              |   |   |          |          |                            |                            |
|----------------|--------------|---|---|----------|----------|----------------------------|----------------------------|
| <i>RPS6</i>    | HGLibA_42155 | 2 | + | 19376483 | 19376502 | CACCGTAGACTAACCTTCATTCTCT  | AAACAGAGAATGAAGTTAGTCTAC   |
| <i>RPS6</i>    | HGLibA_42156 | 3 | + | 19378358 | 19378377 | CACCGCCTCCTACCTTCTTTATTTA  | AAACTAAATAAAGAAGGTAGGAGGC  |
| <i>RPS6</i>    | HGLibB_42101 | 4 | - | 19378724 | 19378743 | CACCGAAAATCTGAGCGTTCTCAACT | AAACAGTTGAGAACGCTCAGATTTT  |
| <i>RPS6</i>    | HGLibB_42102 | 5 | + | 19376572 | 19376591 | CACCGTACGCCGCGTTGTGCTGC    | AAACGCAGCACAAACGGCGGCGTAC  |
| <i>RPS6</i>    | HGLibB_42103 | 6 | - | 19379529 | 19379548 | CACCGTACTTCTATGAGAAGCGTA   | AAACTACGCTTCTCATAGAAAGTAC  |
| <i>RRAGA</i>   | HGLibB_42170 | 1 | - | 19049746 | 19049765 | CACCGGGTGTGCGGAGCAATGTAAT  | AAACATTACATTGCTCGCGACACCC  |
| <i>RRAGA</i>   | HGLibB_42171 | 2 | + | 19049891 | 19049910 | CACCGAGACAATATCTCCGTAACG   | AAACCGTTACGGAAGATATTGTCTC  |
| <i>RRAGA</i>   | HGLibB_42172 | 3 | + | 19049966 | 19049985 | CACCGGCATTATTACCAGTCGTGTC  | AAACGACACGACTGGTAATAATGCC  |
| <i>RRAGA</i>   | HGLibA_42223 | 4 | + | 19049746 | 19049765 | CACCGATTACATTGCTCGCGACACC  | AAACGGTGTGCGGAGCAATGTAATC  |
| <i>RRAGA</i>   | HGLibA_42224 | 5 | + | 19050455 | 19050474 | CACCGCACCTCAAATACGTACGTGA  | AAACTCACGTACGTATTTGAGGTGC  |
| <i>RRAGA</i>   | HGLibA_42225 | 6 | - | 19049978 | 19049997 | CACCGGATGGCCTCCAGACACGAC   | AAACGTCGTGTCTGGAGGCCATCCC  |
| <i>SH3GL2</i>  | HGLibA_43948 | 1 | - | 17795563 | 17795582 | CACCGGTGTCACAGAGCTCGGCAGC  | AAACGCTGCCGAGCTCTGTACGACC  |
| <i>SH3GL2</i>  | HGLibA_43949 | 2 | - | 17795732 | 17795751 | CACCGGCATAACATCCTAATGGGGC  | AAACGCCCCATTAGGATGTTATGCC  |
| <i>SH3GL2</i>  | HGLibA_43950 | 3 | + | 17793404 | 17793423 | CACCGACCTAAACCACGAATGAGCC  | AAACGGCTCATTCTGTGGTTAGGTC  |
| <i>SH3GL2</i>  | HGLibB_43895 | 4 | - | 17791303 | 17791322 | CACCGGTCTGACCGTGACTTGCTGC  | AAACGCAGCAAGTCACGGTCAGACC  |
| <i>SH3GL2</i>  | HGLibB_43896 | 5 | - | 17793390 | 17793409 | CACCGTTAGGTGATATTCCCTTCT   | AAACAGAAGGAATATCAACCTAAC   |
| <i>SH3GL2</i>  | HGLibB_43897 | 6 | + | 17791252 | 17791271 | CACCGTGCACTTGTGCAAGCTCAGC  | AAACGCTGAGCTTGACACAAGTGCAC |
| <i>SLC24A2</i> | HGLibB_44564 | 1 | - | 19786746 | 19786765 | CACCGCTGAAGTTAATTCGAGTCTT  | AAACAAGACTCGAATTAACCTCAGC  |
| <i>SLC24A2</i> | HGLibB_44565 | 2 | - | 19622261 | 19622280 | CACCGCAAGGATGAACCAACTCTAC  | AAACGTAGAGTTGGTTCATCCTTGC  |
| <i>SLC24A2</i> | HGLibB_44566 | 3 | + | 19622248 | 19622267 | CACCGTGTCTTCTACCGGTAGAGT   | AAACACTCTACCGGTAGGAAGCAGC  |
| <i>SLC24A2</i> | HGLibA_44617 | 4 | + | 19619572 | 19619591 | CACCGTGATGTTTACCTTCGGCGAG  | AAACCTCGCCGAAGGTAACATCAC   |
| <i>SLC24A2</i> | HGLibA_44618 | 5 | - | 19619584 | 19619603 | CACCGACCTTGACCCACTCGCCGA   | AAACTCGCGAGTGGGTCAAAGGTC   |
| <i>SLC24A2</i> | HGLibA_44619 | 6 | + | 19785958 | 19785977 | CACCGTCACTTGACGACCTTATTG   | AAACCAATAAGGTCGTCAAGGTGAC  |
| <i>SMU1</i>    | HGLibA_45838 | 1 | - | 33073596 | 33073615 | CACCGCCTCATTGACCTCTATGAAC  | AAACGTTATAGAGGTCAATGAGGC   |
| <i>SMU1</i>    | HGLibA_45839 | 2 | + | 33068858 | 33068877 | CACCGCACACTGACTTCGCCAGCTA  | AAACTAGCTGGCGAAGTCAGTGTGC  |
| <i>SMU1</i>    | HGLibA_45840 | 3 | + | 33073584 | 33073603 | CACCGCCACTCTTACCTGTTCATAG  | AAACCTATGAACAGGTAAGAGTGGC  |
| <i>SMU1</i>    | HGLibB_45783 | 4 | + | 33062107 | 33062126 | CACCGCTTGCCTCGAAACAAATCTA  | AAACTAGATTTGTTTCGAGGCAAGC  |
| <i>SMU1</i>    | HGLibB_45784 | 5 | - | 33068860 | 33068879 | CACCGCTTAGCTGGCGAAGTCAGTG  | AAACCACTGACTTCGCCAGCTAAGC  |
| <i>SMU1</i>    | HGLibB_45785 | 6 | - | 33062114 | 33062133 | CACCGATGACCATAGATTGTTTCG   | AAACCGAAACAAATCTATGGTCATC  |
| <i>SPINK4</i>  | HGLibA_46693 | 1 | + | 33240202 | 33240221 | CACCGTACAGATGGCCGTCCGCCAG  | AAACCTGGCGGACGCCATGCTGAC   |
| <i>SPINK4</i>  | HGLibA_46694 | 2 | - | 33240221 | 33240240 | CACCGAGGCCAGGGCGATTACCCAC  | AAACGTGGGTAAATCGCCCTGGCCTC |
| <i>SPINK4</i>  | HGLibA_46695 | 3 | - | 33246667 | 33246686 | CACCGGCCCATCAGTGCCGCAGACC  | AAACGGTCTGCGGCACTGATGGGCC  |
| <i>SPINK4</i>  | HGLibB_46636 | 4 | - | 33246644 | 33246663 | CACCGTTGACATCTGGGAACAGGT   | AAACACCTGTTCCAGATGTCCAAC   |
| <i>SPINK4</i>  | HGLibB_46637 | 5 | - | 33248445 | 33248464 | CACCGATTTGCCATCTTTCATGATC  | AAACGATCATGAAAGATGGCAAATC  |
| <i>SPINK4</i>  | HGLibB_46638 | 6 | - | 33245139 | 33245158 | CACCGTGCCCTTACCATTCTTGAGAA | AAACTTCTCAAGAATGGTAAGGCAC  |
| <i>TAFIL</i>   | HGLibA_48224 | 1 | - | 32632728 | 32632747 | CACCGATGAAGTTCACGCTGCTCCT  | AAACAGGAGCAGCGTGAACCTTCATC |
| <i>TAFIL</i>   | HGLibA_48225 | 2 | - | 32634276 | 32634295 | CACCGATTGGGAGGATCTATCATC   | AAACGATGATAGAATCTCCCAATC   |
| <i>TAFIL</i>   | HGLibA_48226 | 3 | - | 32635172 | 32635191 | CACCGCTTGACAGCCCTTTACCACT  | AAACAGTGGTAAAGGGGCTGCAAGC  |
| <i>TAFIL</i>   | HGLibB_48165 | 4 | - | 32634448 | 32634467 | CACCGATGCTGGGTGTCTCCGAAGA  | AAACTTCTCGGAGACACCCAGCATC  |
| <i>TAFIL</i>   | HGLibB_48166 | 5 | + | 32635154 | 32635173 | CACCGCATCTTCATCATAATCCGAG  | AAACCTCGGATTATGATGAAGATGC  |
| <i>TAFIL</i>   | HGLibB_48167 | 6 | + | 32634773 | 32634792 | CACCGTCCCTGGTCCAAAAAGATGT  | AAACACATCTTTTGGACCAGGGAC   |

|                |              |   |   |          |          |                            |                             |
|----------------|--------------|---|---|----------|----------|----------------------------|-----------------------------|
| <i>TEK</i>     | HGLibA_48967 | 1 | + | 27202912 | 27202931 | CACCGTTCTATTACTATCCGTTACA  | AAACTGTAACGGATAGTAATAGAAC   |
| <i>TEK</i>     | HGLibA_48968 | 2 | + | 27197355 | 27197374 | CACCGAGACCACTCTAAATTTGACC  | AAACGGTCAAATTTAGAGTGGTCTC   |
| <i>TEK</i>     | HGLibA_48969 | 3 | + | 27197527 | 27197546 | CACCGCCGAGCTAGAGTCAACACCA  | AAACTGGGTGTTGACTCTAGCTCGGC  |
| <i>TEK</i>     | HGLibB_48908 | 4 | - | 27202989 | 27203008 | CACCGCTTGAGCTGATACTGAGTGA  | AAACTCACTCAGTATCAGCTCAAGC   |
| <i>TEK</i>     | HGLibB_48909 | 5 | - | 27173306 | 27173325 | CACCGCAGGAACACCCATAGGGGTC  | AAACGACCCCTATGGGTGTTCTCTGC  |
| <i>TEK</i>     | HGLibB_48910 | 6 | + | 27173246 | 27173265 | CACCGACTTGTAAAGAAAGGTGCAG  | AAACCTGCACCTTTCTTTACAAGTC   |
| <i>TOPORS</i>  | HGLibA_51011 | 1 | - | 32784784 | 32784803 | CACCGGTCCTCCGCTGTCTCGCGAGG | AAACCTCTCGGAGACAGCGGAGACC   |
| <i>TOPORS</i>  | HGLibA_51012 | 2 | - | 32784874 | 32784893 | CACCGAGGATCCGCGAAGGCGTACC  | AAACGGTACGCCCTTCGCGGATCCTC  |
| <i>TOPORS</i>  | HGLibA_51013 | 3 | + | 32784186 | 32784205 | CACCGGCTACCGTACAACCTCTGACA | AAACTGTACAGAGTTGTACGGTAGCC  |
| <i>TOPORS</i>  | HGLibB_50948 | 4 | + | 32784230 | 32784249 | CACCGCTGCATCTACCGGGACTGAC  | AAACGTACAGTCCCGGTAGATGCAGC  |
| <i>TOPORS</i>  | HGLibB_50949 | 5 | + | 32784470 | 32784489 | CACCGCCGACACCGACCTAGCTTTC  | AAACGAAAGCTAGGTCGGTGTCTCGGC |
| <i>TOPORS</i>  | HGLibB_50950 | 6 | - | 32784660 | 32784679 | CACCGGATCTTTCATCTGCCGTAGT  | AAACACTACGGCAGATGAAAGATCC   |
| <i>TMEM215</i> | HGLibA_50218 | 1 | - | 32550927 | 32550946 | CACCGAGCAAACGATGATACTGTCC  | AAACGGACAGTATCATCGTTTGCTC   |
| <i>TMEM215</i> | HGLibA_50219 | 2 | + | 32550852 | 32550871 | CACCGGAGATTAGACGATGGTCTCG  | AAACCGAGACCATCGTCTAATCTCC   |
| <i>TMEM215</i> | HGLibA_50220 | 3 | - | 32543968 | 32543987 | CACCGGGCCTGATGACATTAACCCG  | AAACCGGGTTAATGTATCAGGCC     |
| <i>TMEM215</i> | HGLibB_50158 | 4 | - | 32542168 | 32542187 | CACCGGTCAGTGTCTTCTCTGCTTT  | AAACAAGACGAGGAAGACTGACC     |
| <i>TMEM215</i> | HGLibB_50159 | 5 | - | 32550831 | 32550850 | CACCGACCCCTCAGACCTAGAATC   | AAACGATTCTAGGTCTGAAGGGGTC   |
| <i>TMEM215</i> | HGLibB_50160 | 6 | + | 32543786 | 32543805 | CACCGGCAGTAGCCGTCCAGGTATC  | AAACGATACCTGGACGGCTACTGCC   |
| <i>TUSC1</i>   | HGLibA_52341 | 1 | + | 25678266 | 25678285 | CACCGGCAGCAACTCCCGCGCCTAG  | AAACCTAGCGCGGGAGTTGCTGCC    |
| <i>TUSC1</i>   | HGLibA_52342 | 2 | + | 25678074 | 25678093 | CACCGCCACTCGTCCCGGCACGGA   | AAACTCCGTGCGCGGGACGAGTGGC   |
| <i>TUSC1</i>   | HGLibA_52343 | 3 | - | 25677727 | 25677746 | CACCGCCTCTACAGGAACCCGACTC  | AAACGAGTCGGGTTCTGTAGAGGC    |
| <i>TUSC1</i>   | HGLibB_52276 | 4 | + | 25678097 | 25678116 | CACCGCCTCCAAGTGGCTCGCCGCC  | AAACGGCGCGGAGCCACTTGGAGGC   |
| <i>TUSC1</i>   | HGLibB_52277 | 5 | - | 25678284 | 25678303 | CACCGGCATGCGTGGTGGCGCCACT  | AAACAGTGGCGCCACCACGCATGCC   |
| <i>TUSC1</i>   | HGLibB_52278 | 6 | - | 25677958 | 25677977 | CACCGTTGCGGCTCCCGGCGAAGG   | AAACCCCTCGCCGGGAGCCGCAAC    |
| <i>UBAP2</i>   | HGLibA_52551 | 1 | + | 34017101 | 34017120 | CACCGTTTCCCGAGCACCTCGACAA  | AAACTTGTGCGAGGTGCTCGGAAAC   |
| <i>UBAP2</i>   | HGLibA_52552 | 2 | + | 33927919 | 33927938 | CACCGTGAGACGGAGGTCTGTCGG   | AAACCGGCAGCGACCTCCGTCTCAC   |
| <i>UBAP2</i>   | HGLibA_52553 | 3 | + | 33927868 | 33927887 | CACCGGTTGCGGGTGTTCATGCTAC  | AAACGTAGCATGAACACCGCAACC    |
| <i>UBAP2</i>   | HGLibB_52486 | 4 | - | 34017115 | 34017134 | CACCGGTGAGCAGTGACCATTGTCTG | AAACCGACAATGGTCACTGCTCACC   |
| <i>UBAP2</i>   | HGLibB_52487 | 5 | - | 33927905 | 33927924 | CACCGGTCTCAAGTTCGCATCCTC   | AAACGAGGATGCGGAACTTGAGACC   |
| <i>UBAP2</i>   | HGLibB_52488 | 6 | - | 33927797 | 33927816 | CACCGGCCGCGCCCTTGGTGACCTC  | AAACGAGGTCACCAGGGCGCGGCC    |
| <i>UBE2R2</i>  | HGLibA_52653 | 1 | - | 33912021 | 33912040 | CACCGCATAACTGAAGCATCGACAT  | AAACATGTCGATGCTTCAAGTTATGC  |
| <i>UBE2R2</i>  | HGLibA_52654 | 2 | - | 33886897 | 33886916 | CACCGGTGAATAGGGGTAGTCAAT   | AAACATTGACTACCCCTATTCACCC   |
| <i>UBE2R2</i>  | HGLibA_52655 | 3 | + | 33900248 | 33900267 | CACCGGAATCTACTCAGAATGTG    | AAACCACATTCTGAGTAGGATTCCC   |
| <i>UBE2R2</i>  | HGLibB_52588 | 4 | - | 33911971 | 33911990 | CACCGGCAGTGAGATTACACTTAAT  | AAACATTAAGTGAATCTCACTGCC    |
| <i>UBE2R2</i>  | HGLibB_52589 | 5 | - | 33900256 | 33900275 | CACCGCCTTACCTCACATTCTGAGT  | AAACACTCAGAATGTGAGGTAAGGC   |
| <i>UBE2R2</i>  | HGLibB_52590 | 6 | - | 33886955 | 33886974 | CACCGTCTCCTTACCTCATAAATGT  | AAACACATTTATGAGGTAAGGAGAC   |

---



## Supplementary Table 4

**Hemizygous deletion frequencies.** Number (*N*) and frequency (%) of hemizygous/incomplete deletions of identified genes in TCGA, CCLE and Tumorscape.

| GeneSymbol              | Chr | Start     | End       | TCGA     |      | CCLE     |      | Tumorscape |      |
|-------------------------|-----|-----------|-----------|----------|------|----------|------|------------|------|
|                         |     |           |           | <i>N</i> | %    | <i>N</i> | %    | <i>N</i>   | %    |
| <b>4q34.3 LINC00290</b> |     |           |           |          |      |          |      |            |      |
| <i>LOC90768</i> *       | 4   | 183060158 | 183065668 | 799      | 10.9 | 254      | 24.4 | 201        | 8.1  |
| <i>MIR1305</i> *        | 4   | 183090445 | 183090531 | 797      | 10.9 | 255      | 24.4 | 200        | 8.1  |
| <i>DCTD</i>             | 4   | 183811243 | 183838630 | 793      | 10.8 | 256      | 24.5 | 197        | 8.0  |
| <i>FAM92AIP2</i> *      | 4   | 183958817 | 183961272 | 794      | 10.9 | 248      | 23.8 | 204        | 8.2  |
| <b>9p21.3 CDKN2A</b>    |     |           |           |          |      |          |      |            |      |
| <i>FAM154A</i>          | 9   | 18927890  | 19033256  | 1005     | 13.7 | 300      | 28.8 | 273        | 11.0 |
| <i>RRAGA</i>            | 9   | 19049371  | 19051021  | 1000     | 13.7 | 298      | 28.6 | 269        | 10.9 |
| <i>HAUS6</i>            | 9   | 19053134  | 19102940  | 1002     | 13.7 | 298      | 28.6 | 270        | 10.9 |
| <i>SCARNA8</i> *        | 9   | 19063653  | 19063784  | 999      | 13.7 | 298      | 28.6 | 269        | 10.9 |
| <i>PLIN2</i>            | 9   | 19115758  | 19127604  | 995      | 13.6 | 299      | 28.7 | 269        | 10.9 |
| <i>DENND4C</i>          | 9   | 19230762  | 19374137  | 1012     | 13.8 | 301      | 28.9 | 274        | 11.1 |
| <i>RPS6</i>             | 9   | 19376253  | 19380235  | 995      | 13.6 | 297      | 28.5 | 273        | 11.0 |
| <i>ACO1</i>             | 9   | 32384600  | 32450832  | 761      | 10.4 | 174      | 16.7 | 201        | 8.1  |
| <i>DDX58</i>            | 9   | 32455299  | 32526322  | 746      | 10.2 | 173      | 16.6 | 198        | 8.0  |
| <b>10q23.31 PTEN</b>    |     |           |           |          |      |          |      |            |      |
| <i>WAPAL</i>            | 10  | 88195012  | 88281541  | 963      | 13.2 | 161      | 15.4 | 171        | 6.9  |
| <i>FAM22A</i>           | 10  | 88985204  | 88994733  | 854      | 11.7 | 152      | 14.6 | 149        | 6.0  |
| <i>FAM22A-AS1</i> *     | 10  | 88998423  | 89102315  | 1111     | 15.2 | 196      | 18.8 | 149        | 6.0  |
| <i>LOC439994</i>        | 10  | 89102167  | 89103331  | 1056     | 14.4 | 186      | 17.8 | 149        | 6.0  |
| <i>FAM22D</i>           | 10  | 89117476  | 89130452  | 919      | 12.6 | 168      | 16.1 | 151        | 6.1  |
| <i>HTR7</i>             | 10  | 92500575  | 92617671  | 990      | 13.5 | 158      | 15.1 | 180        | 7.3  |
| <i>RPP30</i>            | 10  | 92631708  | 92668312  | 982      | 13.4 | 158      | 15.1 | 177        | 7.1  |
| <i>ANKRD1</i>           | 10  | 92671856  | 92681032  | 985      | 13.5 | 159      | 15.2 | 177        | 7.1  |
| <b>13q14.2 RBI</b>      |     |           |           |          |      |          |      |            |      |
| <i>SUCLA2</i>           | 13  | 48516790  | 48575462  | 973      | 13.3 | 245      | 23.5 | 257        | 10.4 |
| <i>NUDT15</i>           | 13  | 48611702  | 48621282  | 970      | 13.3 | 246      | 23.6 | 256        | 10.3 |
| <i>MED4</i>             | 13  | 48649863  | 48669277  | 973      | 13.3 | 245      | 23.5 | 256        | 10.3 |
| <i>MED4-AS1</i> *       | 13  | 48651272  | 48654129  | 972      | 13.3 | 245      | 23.5 | 256        | 10.3 |
| <b>17p12 MAP2K4</b>     |     |           |           |          |      |          |      |            |      |
| <i>MYH13</i>            | 17  | 10204182  | 10276322  | 1321     | 18.1 | 260      | 24.9 | 310        | 12.5 |
| <i>MYH8</i>             | 17  | 10293641  | 10325267  | 1323     | 18.1 | 260      | 24.9 | 308        | 12.4 |
| <i>MYH4</i>             | 17  | 10346607  | 10372876  | 1315     | 18.0 | 261      | 25.0 | 307        | 12.4 |
| <i>MYH1</i>             | 17  | 10395626  | 10421859  | 1323     | 18.1 | 261      | 25.0 | 307        | 12.4 |
| <i>MYH2</i>             | 17  | 10424464  | 10452940  | 1324     | 18.1 | 262      | 25.1 | 307        | 12.4 |

|                      |    |          |          |      |      |     |      |     |      |
|----------------------|----|----------|----------|------|------|-----|------|-----|------|
| <i>MYH3</i>          | 17 | 10531842 | 10560626 | 1319 | 18.0 | 258 | 24.7 | 311 | 12.6 |
| <i>SCO1</i>          | 17 | 10583648 | 10600885 | 1318 | 18.0 | 258 | 24.7 | 312 | 12.6 |
| <i>ELAC2</i>         | 17 | 12894928 | 12921381 | 1331 | 18.2 | 249 | 23.9 | 304 | 12.3 |
| <b>17q11.2 NFI</b>   |    |          |          |      |      |     |      |     |      |
| <i>GOSR1</i>         | 17 | 28804425 | 28853832 | 584  | 8.0  | 91  | 8.7  | 91  | 3.7  |
| <i>SUZ12P1</i>       | 17 | 29036625 | 29097068 | 579  | 7.9  | 92  | 8.8  | 89  | 3.6  |
| <i>CRLF3</i>         | 17 | 29109701 | 29151778 | 600  | 8.2  | 91  | 8.7  | 88  | 3.6  |
| <i>ATAD5</i>         | 17 | 29159022 | 29222295 | 614  | 8.4  | 98  | 9.4  | 89  | 3.6  |
| <i>TEFM</i>          | 17 | 29226000 | 29233286 | 604  | 8.3  | 98  | 9.4  | 87  | 3.5  |
| <i>ADAP2</i>         | 17 | 29248753 | 29286211 | 610  | 8.3  | 99  | 9.5  | 88  | 3.6  |
| <i>COPRS</i>         | 17 | 30178883 | 30186326 | 619  | 8.5  | 97  | 9.3  | 84  | 3.4  |
| <i>LRRC37B</i>       | 17 | 30348154 | 30380519 | 615  | 8.4  | 93  | 8.9  | 82  | 3.3  |
| <i>SH3GLIP1</i> *    | 17 | 30367354 | 30369851 | 612  | 8.4  | 93  | 8.9  | 82  | 3.3  |
| <i>RHOT1</i>         | 17 | 30469472 | 30552746 | 615  | 8.4  | 89  | 8.5  | 87  | 3.5  |
| <i>ARGFXP2</i> *     | 17 | 30477386 | 30478590 | 613  | 8.4  | 89  | 8.5  | 85  | 3.4  |
| <b>18q21.2 SMAD4</b> |    |          |          |      |      |     |      |     |      |
| <i>CCDC11</i>        | 18 | 47753562 | 47792865 | 972  | 13.3 | 341 | 32.7 | 189 | 7.6  |
| <i>MBD1</i>          | 18 | 47793251 | 47808144 | 972  | 13.3 | 341 | 32.7 | 189 | 7.6  |
| <i>CXXC1</i>         | 18 | 47808712 | 47814692 | 971  | 13.3 | 341 | 32.7 | 187 | 7.6  |
| <i>SKA1</i>          | 18 | 47901391 | 47920538 | 974  | 13.3 | 340 | 32.6 | 186 | 7.5  |

\* non protein coding gene

## Supplementary Table 5

PCR primer sequences used for detecting CRISPR-Induced Insertion/Deletions.

| <b>gene_id</b>  | <b>UID</b>                 | <b>sgRNA nr</b> | <b>Forward primer (5'-3')</b> | <b>Reverse primer (5'-3')</b> |
|-----------------|----------------------------|-----------------|-------------------------------|-------------------------------|
| <i>ACER2</i>    | HGLibB_00430, HGLibB_00431 | 1,2             | CCAATGCCCCGGAGTG              | AGAGACCCACGTCCAGCTT           |
| <i>ACER2</i>    | HGLibB_00432               | 3,6             | TTTGCCCTTTTTACTTAATACTCATC    | AATTCCTTCTACCCCATCC           |
| <i>ACER2</i>    | HGLibB_00430, HGLibB_00431 | 4,5             | TTGAATTTGTGTCTCTTCTGTGG       | AAGATCTTTGGTAGATACCTTCTGG     |
| <i>ACO1</i>     | HGLibA_00460               | 1               | GGGTCAGCCAATCAGTATGG          | TGGAAACCAAACAAGATTCCA         |
| <i>ACO1</i>     | HGLibA_00461               | 2               | TTATATAGAGATTGGCCTTAAAGA      | TTCTGTGCTGCGTGACATT           |
| <i>ACO1</i>     | HGLibA_00462               | 3               | GATTTCTAGGTCCAGACCTCTT        | TCACAGCCATGTACCTACCA          |
| <i>ACO1</i>     | HGLibB_00460               | 4               | CCATTCGGAATTGTGATGAG          | AAAACCTTCTTGAAAGGCTAATGA      |
| <i>ACO1</i>     | HGLibB_00461, HGLibB_00462 | 5,6             | GCTGTGGTTGACTTTGCTG           | AAAGATTTTGCACAAAGCAGAA        |
| <i>ANKRD18B</i> | HGLibA_02020, HGLibA_02021 | 1,2             | GTGGAAAGGCCACGAGGA            | CAGGCAGTGCTCCACCTC            |
| <i>ANKRD18B</i> | HGLibA_02022, HGLibA_02019 | 3,5             | CCTGTGGAATATGTATTTGAATTCTT    | TCTGTACCTTGTTTAGTGCTTCAA      |
| <i>ANKRD18B</i> | HGLibB_02018               | 4               | GACTGTCTACATTTGGCCTGT         | CCACAGTTTCACCAACTAGC          |
| <i>AQP3</i>     | HGLibA_02592, HGLibA_02593 | 1,2             | TCCTATAAAGGGAGCCACCA          | CCCTCCACTCACCACCAG            |
| <i>AQP3</i>     | HGLibA_02594, HGLibA_02591 | 3,5             | GTGGCAGGCTGCAGCTAATA          | GGTGGGAATGCTTACCATA           |
| <i>AQP3</i>     | HGLibB_02590               | 4               | GAGAGTTGCTGGTCCTCACC          | AAGGCCTTACCAGAGACCTG          |
| <i>AQP3</i>     | HGLibB_02592               | 6               | TCTAATCTGTCCACAGATGCAA        | CCATGAGCTACCAAGGCAAC          |
| <i>AQP7</i>     | HGLibA_02604, HGLibA_02605 | 1,2             | CTGTTGTTTGTCTGCTCTCACT        | CTGTAGAAGAGACTGTAGATGGTG      |
| <i>AQP7</i>     | HGLibA_02606, HGLibA_02603 | 3,5             | TCAGCTGGGAGTTGAAGAGC          | ACCCACTCACCATCATGACA          |
| <i>AQP7</i>     | HGLibB_02602, HGLibB_02604 | 4,6             | TTGTAGGTATTCGGCCTTGG          | GGGCAGGAAAGAGCCTGT            |
| <i>B4GALTI</i>  | HGLibA_04022, HGLibA_04024 | 1,3             | CAATGTTGGCTTCAAGAAG           | CTAGTCAACACATGAGAGAGACAT      |
| <i>B4GALTI</i>  | HGLibA_04023               | 2               | GCAAAGCAGAACCCAAATGT          | AGGCCTCACCTGGTTGATAA          |
| <i>B4GALTI</i>  | HGLibB_04020               | 4               | ATCTGATGCAGCCTGTGGA           | GCCACCTTGTGAGGAGAGAC          |
| <i>B4GALTI</i>  | HGLibB_04021               | 5               | GGAGACAATGCTCTCTGATGG         | GACCAGCCCAGCAGATTG            |
| <i>B4GALTI</i>  | HGLibB_04022               | 6               | GGGAGGAGGAAGTACGTGTG          | TGTGATTTGGGTATACAATGGGTA      |
| <i>DENND4C</i>  | HGLibB_12937               | 1               | CATTGCCATTATTATCAAATCAGC      | CCAATATCTGTAAGCGGTGGT         |
| <i>DENND4C</i>  | HGLibB_12938, HGLibB_12939 | 2,3             | GTTGGTATCCAACAAAATCAA         | TCTTTTAGCCAAATGTTAATATGC      |

|                |                                          |       |                            |                            |
|----------------|------------------------------------------|-------|----------------------------|----------------------------|
| <i>DENND4C</i> | HGLibA_12955                             | 4     | GGTATCTTTCCCTCCCTCTT       | TGGAGCTTTAGGTCCAGTTGA      |
| <i>DENND4C</i> | HGLibA_12956, HGLibA_12957               | 5,6   | TCTATTTCTTCCCTTCCTG        | CAGTTACAGCCAAGGAATTCTG     |
| <i>DNAJA1</i>  | HGLibA_13509, HGLibA_13510               | 1,2   | TGATTCGTGATTTGAAAAATATAAA  | TACTACACTTTGTTAACAGGAGACA  |
| <i>DNAJA1</i>  | HGLibA_13511                             | 3     | GCATTTAGGAATTGTCTTCTTAAAAC | GCACTCCATGCACACAGACT       |
| <i>DNAJA1</i>  | HGLibB_13490                             | 4     | GGAGCGGATCAGTCCTAAAG       | TGTTAATAATAAATCTGCCACAGCA  |
| <i>DNAJA1</i>  | HGLibB_13491                             | 5     | TGAAATTCACCTCTTTTCTCAA     | ATCCTTCTCCTCCTCCAAA        |
| <i>DNAJA1</i>  | HGLibB_13492                             | 6     | CCAGCATCTTAAACAGATTTGC     | TTCAGGTGTCATATTAAGGTGCT    |
| <i>FAM154A</i> | HGLibB_16151                             | 1     | GACTGCCTGACCACCACTC        | CCAGGAGGCTCAGGATATGA       |
| <i>FAM154A</i> | HGLibB_16152, HGLibB_16153               | 2,3   | AAACCATGTCTTCTCTCCGAAT     | CATTAGCACTGCATGTTACTCC     |
| <i>FAM154A</i> | HGLibA_16173, HGLibA_16174               | 4,5   | TTGCTCACGACGTATAAGAAAGA    | TGCACATAAAACACATTTCTG      |
| <i>FAM154A</i> | HGLibA_16175                             | 6     | CCACTTCGTCTGGAACACAA       | TGGGCCACATAGCTCATCTT       |
| <i>HAUS6</i>   | HGLibB_20860, HGLibB_20861               | 1,2   | TGTGATGTAATGTAAGAGTTATTGTT | TGAACTTACTTTTAGAATTGGATTTA |
| <i>HAUS6</i>   | HGLibB_20862, HGLibB_20888, HGLibB_20889 | 3,4,5 | GCCTGTTTTCTATAATCTTATTTGTG | GGTGACATCTGTTCAAAAAGAAA    |
| <i>HAUS6</i>   | HGLibA_20890                             | 6     | TGTGCATAGTCCTTACGCTTTT     | AAGCATTAAAAGGATTTACCTC     |
| <i>NDUFB6</i>  | HGLibA_31523, HGLibA_31525               | 1,3   | GGGAGCGCGCTTAAGTAAC        | TAGGCCCCATCTTCTGTGG        |
| <i>NDUFB6</i>  | HGLibA_31524                             | 2     | TGGGATATGTTTATTTTGTGTATGTG | GCCACAAAGAAAGTAATTTTGGG    |
| <i>NDUFB6</i>  | HGLibB_31481                             | 4     | TCCATGTGAGATCTGATGAACA     | GGCTCATAAGCCTTTTAACTTTTT   |
| <i>NDUFB6</i>  | HGLibB_31482, HGLibB_31483               | 5,6   | AAAATTTGGGGTATGACCTATTT    | AATCTAATAATTGCTTGGAAAGG    |
| <i>NOL6</i>    | HGLibA_32270, HGLibA_32271               | 1,2   | TCACTGGCCACAGGTGAT         | AGCTGCAGACACTCAACAGT       |
| <i>NOL6</i>    | HGLibA_32272, HGLibA_32229               | 3,6   | CAGGTAGAGGAGCTACTAAAGGA    | GGCCCCGTTTGTATATACCC       |
| <i>NOL6</i>    | HGLibB_32227, HGLibB_32228               | 4,5   | AGCTGGAGGGAAGAGGTGT        | CAGAAGTGCCACGCCATC         |
| <i>PLIN2</i>   | HGLibB_37124                             | 1     | CTTTGATTGCAGAGTGTGGTG      | CTTCTGGATGATGGGCAGAG       |
| <i>PLIN2</i>   | HGLibB_37125, HGLibB_37172               | 2,4   | TGTCCTGTGCTCATTTTTT        | TGTTAATGCTGCCACTGACC       |
| <i>PLIN2</i>   | HGLibB_37126                             | 3     | GCAGTTGCCAATACCTATGC       | GATCCAGGTTGGGAAAACAA       |
| <i>PLIN2</i>   | HGLibA_37173, HGLibA_37174               | 5,6   | AAGTTGAAGGATTTGATCTGGTTC   | GCCTAGAGATAAATGAACCCACTT   |
| <i>PRSS3</i>   | HGLibA_38922, HGLibA_38924               | 1,3   | CAAGTGTGGAAAGGTCTGG        | AGCCCTCCTCCAGTTTCAAG       |
| <i>PRSS3</i>   | HGLibA_38923, HGLibA_38874               | 2,5   | ACAACATCAAAGTCCTGGAG       | CCACCAAAGCTCAGAGTGT        |
| <i>PRSS3</i>   | HGLibB_38873                             | 4     | GGGCTTGAAACTGGAGGA         | CTCCCGTCTCCCTAGA           |
| <i>PRSS3</i>   | HGLibB_38875                             | 6     | CCCTGAGCAGGTGAGTCAGT       | GGAGGGGACACAGGTTAGGT       |
| <i>RPS6</i>    | HGLibA_42154                             | 1     | AGGATTCTTAAGGAAGTTGTTGAA   | CAACATACTGGCGGACATCA       |
| <i>RPS6</i>    | HGLibA_42155                             | 2     | CGGCGTATTGCTCTGAAGAA       | GCCTCCTAAACAAAACAAAACA     |

|               |                                          |       |                           |                        |
|---------------|------------------------------------------|-------|---------------------------|------------------------|
| <i>RPS6</i>   | HGLibA_42156                             | 3     | CCCCAAAAGAGCTAGCAGAA      | AGTGCTAAGGCCTTCCAAAG   |
| <i>RPS6</i>   | HGLibB_42101                             | 4     | CCGCCTGCTACTGAGTAAGG      | GCATTTGGACAACCTGGCTTT  |
| <i>RPS6</i>   | HGLibB_42102                             | 5     | TGAAATGATTGAGTCCTTTGAATTT | TCTTGGCCAAAAGTTTAGCAT  |
| <i>RPS6</i>   | HGLibB_42103                             | 6     | CCTTAGCTGAACATCTCCTTCC    | CAATGGCGTTTACCGTCTCT   |
| <i>RRAGA</i>  | HGLibB_42170, HGLibB_42223               | 1,4   | TGCCAAATACAGCCATGAAG      | CACAGGTTCAGCACCAGGTT   |
| <i>RRAGA</i>  | HGLibB_42171, HGLibB_42172, HGLibB_42225 | 2,3,6 | CTGGTGCTGAACCTGTGG        | CGCTGATCCTCCTGAACC     |
| <i>RRAGA</i>  | HGLibA_42224                             | 5     | AGTAAATTGGCCGCTTCCTT      | CCATCCACTCTCTCCAGCTT   |
| <i>SMUI</i>   | HGLibA_45838, HGLibA_45840               | 1,3   | TGTGGCTGACATTAACAGTGG     | TGAAGGAATGCTCACTGACG   |
| <i>SMUI</i>   | HGLibA_45839, HGLibA_45784               | 2,5   | ACACCCTCTCCTTTTTTCAGG     | CTCAGCCTCCCAAAGTCAAG   |
| <i>SMUI</i>   | HGLibB_45783, HGLibB_45785               | 4,6   | AAGCACCTGAACAGATTGCTATATT | CTGACTGGCTGAATGTCTTAGG |
| <i>TOPORS</i> | HGLibA_51011, HGLibA_51012, HGLibA_50949 | 1,2,5 | GCTCTCTGCCCTGCTTCC        | TTGTTCCGAATCTCACTACC   |
| <i>TOPORS</i> | HGLibA_51013                             | 3     | CCATTCTGTGAGGGCAGAAG      | CCACTATCCGGTGGAGTTGT   |
| <i>TOPORS</i> | HGLibB_50948                             | 4     | TCTGAAAGAACAAATGCTAGGAAA  | TGAGCCACTTCGTTAGTACCC  |
| <i>TOPORS</i> | HGLibB_50950                             | 6     | TACTGTTTGAAGGGTTAGGCATT   | TTCTAACTCGAGCACCAGCA   |

---
